# Supplementary material for: An Integrative Metabolomic and Network Pharmacology Study Revealing the Regulating Properties of Xihuang Pill That Improves Anlotinib Effects in Lung Cancer
Source: Frontiers journal article supplement (doi:10.3389/fonc.2021.697247), 2021-08-09
Supplement: Data_Sheet_1.ZIP [file Data_Sheet_1.ZIP]

## Sheet: posAXvsX
Var ID (Primary)	M2.VIP[1+4+0]	M2.p(corr)[1]
V40	5.41891	0.696841
V16	4.10917	0.705653
V81	3.72906	-0.318341
V42	3.71756	0.373841
V62	3.53108	-0.69426
V135	3.52821	-0.688807
V44	3.36207	-0.69098
V97	3.32435	-0.705681
V31	3.32356	-0.74558
V140	3.26151	-0.759896
V300	3.25134	-0.720411
V3	3.12852	0.430575
V63	3.02462	0.676436
V166	2.96266	-0.11533
V110	2.91886	-0.476687
V221	2.82636	0.476386
V33	2.7075	-0.770346
V333	2.59618	0.229011
V163	2.59108	-0.557592
V67	2.4878	0.664215
V38	2.42005	0.425548
V30	2.41194	0.508198
V387	2.40722	0.954592
V22	2.38028	-0.341376
V491	2.37402	0.234542
V28	2.35253	0.703241
V50	2.25611	-0.128377
V214	2.20827	0.295043
V45	2.18858	-0.819073
V250	2.18345	0.352963
V702	2.16744	-0.00652209
V18	2.16699	-0.71731
V141	2.16031	-0.759519
V137	2.15421	-0.698589
V68	2.15093	-0.811443
V207	2.15078	-0.715014
V281	2.14773	0.183519
V34	2.10875	-0.760863
V308	2.07678	0.548544
V138	2.06193	-0.72341
V13	2.05885	-0.687968
V791	2.05661	0.241717
V95	2.04533	-0.695106
V32	2.03813	-0.837113
V20	2.02307	-0.839525
V228	1.9679	-0.671546
V396	1.96109	0.239189
V8	1.95187	-0.431805
V142	1.92104	-0.772822
V17	1.91904	0.153218
V126	1.88278	0.695387
V375	1.87173	-0.601973
V120	1.87083	-0.361445
V728	1.84464	-0.00938474
V275	1.76118	0.653096
V29	1.76069	0.439027
V64	1.73214	-0.268472
V39	1.72665	-0.246679
V337	1.72512	0.552228
V125	1.7193	-0.527974
V391	1.71235	-0.573242
V12	1.70424	-0.0344261
V261	1.68603	-0.52274
V1	1.66003	0.0321617
V323	1.6564	0.589392
V279	1.65075	-0.693733
V318	1.63575	-0.823678
V591	1.62021	-0.814976
V94	1.61836	0.651416
V59	1.61744	-0.471489
V260	1.5978	0.633711
V10	1.57041	-0.262534
V857	1.56728	0.296922
V294	1.56284	-0.152589
V170	1.56096	-0.362618
V227	1.54331	-0.495405
V654	1.53733	-0.43589
V351	1.5311	0.541873
V301	1.52601	-0.623861
V339	1.52051	-0.420688
V541	1.51302	-0.559843
V60	1.51147	0.475767
V314	1.51067	-0.551007
V404	1.50487	-0.685518
V139	1.50329	0.60813
V230	1.50245	0.324433
V472	1.49665	-0.451069
V350	1.48925	-0.813963
V148	1.47743	-0.780227
V129	1.46698	0.713617
V560	1.46607	-0.665046
V397	1.46184	0.484515
V108	1.46177	-0.0781678
V203	1.45245	-0.805478
V430	1.4487	-0.190002
V528	1.44591	-0.63823
V421	1.44294	-0.84293
V193	1.44038	0.576302
V830	1.42225	-0.473179
V223	1.41772	-0.284789
V239	1.41271	0.270501
V771	1.40638	-0.499835
V252	1.40394	0.379709
V198	1.39686	0.256742
V344	1.39508	-0.509563
V263	1.39454	0.423346
V796	1.38342	-0.50031
V232	1.38035	-0.525519
V701	1.37976	-0.0562259
V597	1.36932	-0.493553
V224	1.36863	-0.528295
V393	1.36341	0.571096
V9	1.36234	0.362488
V682	1.36052	-0.474812
V289	1.35797	0.0885567
V739	1.35471	-0.521361
V516	1.35438	-0.568902
V749	1.34697	-0.645805
V262	1.33729	0.10262
V65	1.33025	0.38104
V280	1.31999	-0.56259
V55	1.31668	-0.408169
V86	1.31244	-0.370944
V5	1.31181	0.190228
V595	1.3038	-0.564298
V238	1.29979	0.375968
V432	1.29751	0.0757384
V400	1.29376	0.608004
V833	1.29228	0.656454
V720	1.28909	0.400014
V476	1.28873	0.556456
V419	1.28764	0.391841
V324	1.27433	0.522141
V7	1.25683	0.183512
V99	1.24932	0.52291
V276	1.24626	0.381905
V303	1.24578	-0.804449
V98	1.24526	0.281447
V500	1.2438	-0.729085
V335	1.24316	0.337947
V422	1.23716	-0.772797
V151	1.23508	-0.17644
V707	1.23265	-0.426684
V299	1.22902	0.410072
V177	1.22568	-0.19853
V69	1.22375	0.0157239
V823	1.22334	-0.823064
V222	1.22289	-0.310535
V89	1.21973	0.379943
V218	1.21901	-0.535542
V26	1.21897	0.173577
V647	1.21177	0.346095
V305	1.20707	-0.529473
V19	1.19659	0.536301
V473	1.19206	-0.669585
V496	1.18549	-0.48713
V710	1.17839	0.419033
V27	1.17816	0.364292
V633	1.17495	-0.680973
V325	1.1688	-0.0929965
V834	1.1634	-0.47746
V272	1.15493	0.399326
V792	1.15423	-0.53351
V4	1.15313	0.501903
V855	1.15311	0.279397
V201	1.15262	0.597276
V75	1.14989	-0.158008
V107	1.14914	0.326371
V527	1.13396	-0.732709
V355	1.13084	0.581318
V35	1.12691	0.117188
V92	1.121	0.11648
V446	1.11922	-0.766868
V590	1.1182	-0.265758
V11	1.11744	-0.00735661
V253	1.11538	0.199906
V115	1.11453	-0.153754
V6	1.11197	0.311344
V822	1.11138	0.296948
V79	1.10658	-0.526578
V41	1.09803	0.173611
V673	1.09482	0.277996
V821	1.0938	-0.49079
V580	1.08728	0.14421
V712	1.08505	0.642076
V828	1.08051	-0.550251
V795	1.0754	-0.478848
V392	1.07422	0.289491
V226	1.06898	-0.315652
V381	1.06774	0.274643
V681	1.06715	-0.62855
V101	1.06317	0.276543
V306	1.05894	0.540017
V191	1.05739	-0.691059
V58	1.05702	-0.345983
V103	1.05691	0.463811
V215	1.05363	0.106114
V157	1.04899	-0.36985
V211	1.04647	-0.239991
V194	1.03898	0.429691
V117	1.03602	0.0955094
V56	1.02513	-0.232621
V770	1.02435	-0.450346
V388	1.02312	0.350509
V105	1.0228	0.436337
V257	1.02249	-0.270421
V366	1.0221	0.499169
V551	1.01488	0.129577
V706	1.01124	0.120385
V420	1.0059	-0.556587
V409	1.00455	-0.32938
V762	1.00311	0.0684087
V680	1.00181	-0.422265
V768	0.998517	-0.476984
V641	0.998322	0.142384
V452	0.992813	-0.361941
V264	0.992698	0.340265
V356	0.991921	0.556051
V843	0.989832	-0.0936833
V814	0.989715	0.130905
V183	0.989668	-0.202329
V82	0.988831	0.596442
V347	0.988371	0.574582
V858	0.985317	-0.178085
V798	0.98381	0.598453
V46	0.983288	0.143072
V154	0.982377	0.0984272
V741	0.977592	-0.533847
V524	0.976612	0.550135
V443	0.973108	0.705581
V71	0.97268	0.372111
V246	0.971859	0.376297
V711	0.96827	0.580001
V21	0.967486	0.292305
V124	0.965383	-0.0698054
V793	0.965254	0.345343
V542	0.964279	0.368963
V369	0.963752	-0.526446
V507	0.960414	-0.488204
V87	0.958013	-0.0519344
V656	0.956995	0.581026
V102	0.956252	0.352327
V54	0.952547	0.540253
V104	0.950932	-0.367733
V625	0.950286	-0.459062
V844	0.942526	0.350708
V307	0.942292	0.315534
V290	0.941886	0.623629
V395	0.937055	0.708076
V766	0.936965	-0.584643
V826	0.936383	-0.476872
V113	0.932869	0.341476
V474	0.932247	0.507701
V277	0.931257	0.477581
V133	0.929497	-0.303173
V180	0.92558	-0.215508
V265	0.925489	0.554119
V49	0.924757	-0.216924
V697	0.921143	0.205976
V816	0.917133	0.047279
V808	0.916786	0.3223
V585	0.915254	-0.579982
V15	0.913755	-0.229803
V815	0.90954	0.335468
V72	0.907805	0.162397
V184	0.904385	-0.135349
V612	0.903427	0.33466
V368	0.901532	0.48422
V165	0.900097	0.0490592
V534	0.896906	-0.190322
V370	0.894225	-0.436337
V330	0.892759	0.595558
V448	0.892744	0.58183
V179	0.891176	-0.137906
V169	0.887942	0.586305
V96	0.884833	-0.405729
V738	0.884215	0.0274189
V160	0.883355	-0.24857
V457	0.881943	-0.113515
V237	0.879138	0.500915
V172	0.868067	-0.53098
V864	0.865848	0.589322
V283	0.865445	0.554718
V343	0.864821	0.159654
V122	0.864751	0.500303
V881	0.863117	-0.595495
V155	0.860196	-0.219574
V842	0.859038	-0.29673
V713	0.858232	0.599865
V628	0.85692	0.293491
V785	0.856772	-0.00315408
V220	0.852512	-0.322464
V153	0.852386	0.712358
V130	0.848287	-0.276902
V383	0.847943	-0.258296
V769	0.847453	-0.549041
V423	0.845301	0.259606
V695	0.844759	0.219435
V790	0.842744	-0.60504
V489	0.839945	-0.442371
V417	0.833571	-0.32917
V266	0.832846	0.506808
V662	0.830404	-0.64629
V539	0.826401	0.325917
V346	0.82586	0.571028
V248	0.824537	0.399474
V354	0.824132	0.40506
V48	0.822347	-0.282959
V274	0.821248	0.309102
V156	0.820382	0.347044
V90	0.819015	0.237959
V614	0.818809	0.101708
V273	0.818204	0.446891
V386	0.817803	0.608871
V231	0.816661	0.23524
V106	0.814795	-0.184717
V588	0.809446	-0.502418
V127	0.807282	0.438251
V111	0.805274	0.492338
V219	0.805089	-0.235504
V475	0.805008	0.481374
V809	0.803715	-0.269872
V174	0.800418	-0.150792
V564	0.79376	0.367506
V767	0.79255	-0.517907
V794	0.792548	0.539838
V175	0.792331	-0.062841
V380	0.790687	-0.653223
V563	0.787376	0.488926
V672	0.784085	0.450032
V608	0.780968	0.457968
V315	0.779361	-0.0376373
V652	0.779003	0.485312
V868	0.77783	0.294071
V532	0.772346	0.193138
V145	0.772326	0.193562
V780	0.772184	-0.0860135
V2	0.771771	0.36801
V292	0.76979	-0.310468
V745	0.769302	0.554962
V725	0.762675	0.417352
V164	0.761109	-0.108534
V797	0.75925	0.399152
V856	0.759127	0.208003
V817	0.753965	0.57902
V61	0.751995	0.392253
V212	0.750667	0.270941
V501	0.749116	0.174637
V493	0.748601	-0.532672
V582	0.748577	-0.0714003
V367	0.747847	-0.0425844
V642	0.747562	-0.302472
V853	0.747389	0.136596
V872	0.746347	0.445071
V470	0.746	0.320094
V619	0.74119	0.354105
V469	0.740473	0.523303
V361	0.739179	0.247919
V450	0.736562	0.362299
V444	0.734268	-0.611157
V755	0.733794	0.562644
V158	0.733696	0.292766
V187	0.732101	-0.151143
V378	0.72861	0.260848
V150	0.728588	0.439739
V199	0.728017	-0.264663
V185	0.725185	-0.227036
V267	0.725008	0.612947
V677	0.724369	0.577283
V502	0.723521	-0.575831
V730	0.723221	0.528332
V161	0.717948	0.401357
V754	0.715726	-0.489849
V243	0.715554	0.169897
V322	0.714492	-0.452307
V788	0.713957	-0.380032
V287	0.705636	0.526108
V668	0.704054	0.397826
V760	0.703565	-0.139902
V168	0.701612	0.374111
V753	0.700779	-0.0215141
V708	0.698948	-0.11133
V320	0.695141	0.354844
V336	0.695141	0.421982
V851	0.693233	0.302114
V427	0.693002	0.38433
V665	0.69296	-0.348926
V525	0.691241	0.391354
V371	0.689818	-0.256911
V241	0.689777	0.390918
V372	0.687971	-0.0389715
V78	0.686891	0.119136
V774	0.684537	0.390472
V399	0.683761	-0.216502
V631	0.683673	0.552445
V196	0.683386	-0.271106
V664	0.683263	0.456634
V699	0.682724	0.218282
V589	0.681948	0.182443
V360	0.680455	0.197525
V178	0.678761	-0.228571
V869	0.678303	0.169132
V269	0.676616	0.357505
V764	0.675815	-0.34836
V74	0.67409	-0.167337
V349	0.673234	0.483557
V88	0.671931	0.0760163
V519	0.671712	-0.10368
V463	0.671124	0.498293
V575	0.666515	-0.196592
V530	0.665573	0.168239
V83	0.665438	0.477926
V781	0.664885	0.0714679
V610	0.664777	0.273521
V775	0.663477	0.382158
V863	0.662884	-0.625408
V91	0.661849	0.395855
V669	0.661105	-0.127176
V338	0.661059	0.334022
V362	0.660749	0.396955
V870	0.659402	0.206648
V270	0.658868	0.300684
V517	0.656067	0.597326
V365	0.655122	0.376667
V850	0.65403	0.211133
V256	0.653341	0.501551
V353	0.652148	0.149614
V200	0.650347	-0.256268
V210	0.648937	-0.117607
V244	0.648799	0.259224
V70	0.648376	0.019205
V847	0.647827	0.593292
V505	0.64602	0.428556
V458	0.645583	0.112265
V441	0.645523	0.406866
V410	0.645087	-0.276869
V217	0.644697	-0.373169
V508	0.642226	-0.482713
V630	0.641887	-0.291039
V293	0.641465	0.435577
V249	0.63994	0.235388
V567	0.639205	-0.352711
V47	0.637458	0.160047
V646	0.635018	0.0938959
V85	0.634656	-0.161869
V481	0.630603	0.411784
V255	0.630391	-0.0401455
V454	0.630308	0.30543
V503	0.629082	0.303799
V144	0.627905	0.366348
V715	0.625212	0.441069
V866	0.624527	0.119592
V547	0.621925	0.388458
V425	0.62077	0.402207
V862	0.620212	0.284668
V109	0.618052	0.178455
V66	0.617975	0.40736
V800	0.614879	-0.308936
V639	0.613586	0.392281
V609	0.613022	0.377487
V827	0.612036	0.428846
V414	0.611507	0.388443
V763	0.611196	-0.249695
V526	0.610677	0.261584
V206	0.606802	0.346397
V456	0.606725	-0.314172
V543	0.605964	0.355295
V309	0.605408	0.178681
V440	0.604423	0.25803
V317	0.603766	0.254043
V587	0.603707	0.348228
V820	0.603062	-0.20885
V671	0.60226	0.304437
V504	0.602232	0.347049
V288	0.602117	0.468929
V401	0.601589	-0.193217
V515	0.599342	-0.452389
V332	0.595809	0.30433
V555	0.594457	0.594699
V696	0.594348	-0.207034
V540	0.59429	-0.342398
V327	0.593316	-0.318828
V43	0.591652	0.280701
V171	0.591346	0.028561
V176	0.589689	0.361958
V76	0.589519	0.221343
V482	0.585022	0.257152
V167	0.58411	-0.00360879
V181	0.583312	-0.0547394
V871	0.581096	0.222486
V331	0.579385	0.421967
V321	0.578825	0.22952
V77	0.578663	0.0964057
V861	0.57696	0.494773
V202	0.576375	-0.17743
V328	0.575822	-0.0800139
V53	0.568762	0.389993
V234	0.56844	-0.178764
V694	0.567747	-0.18555
V722	0.56723	0.478384
V389	0.567153	-0.300479
V478	0.566069	0.195042
V566	0.56594	-0.00838207
V209	0.563325	0.180837
V818	0.562425	0.197804
V384	0.561011	-0.0391812
V229	0.55997	0.324297
V615	0.559886	0.441913
V149	0.559573	-0.103885
V182	0.559411	0.0994378
V205	0.555627	0.191624
V483	0.553637	-0.274611
V162	0.553174	0.0838725
V666	0.552842	-0.0949688
V637	0.552079	0.360302
V835	0.551872	-0.0104219
V271	0.548809	0.316835
V803	0.54861	0.431704
V829	0.547472	-0.530507
V783	0.547313	-0.385364
V838	0.546428	0.198812
V488	0.545706	0.106559
V394	0.544541	-0.13584
V724	0.543551	0.438067
V188	0.542695	-0.137793
V434	0.542643	-0.0110666
V773	0.542507	0.247075
V302	0.538705	0.253622
V735	0.536831	-0.257559
V73	0.534158	0.269564
V667	0.53304	-0.116798
V854	0.531882	-0.437796
V726	0.530608	0.129796
V453	0.526537	0.300453
V499	0.52568	0.350625
V743	0.525481	0.349875
V687	0.5248	0.3163
V596	0.523702	0.388861
V836	0.523544	0.483677
V723	0.522726	0.469703
V616	0.522155	-0.275058
V556	0.520428	-0.254191
V251	0.520102	0.110838
V235	0.519449	-0.12817
V132	0.519338	0.188898
V579	0.519318	-0.401469
V509	0.518592	-0.158514
V875	0.516988	0.39283
V529	0.51674	0.0250316
V116	0.515375	0.270409
V286	0.514837	0.107616
V461	0.513448	-0.17648
V742	0.510805	0.0795455
V152	0.509433	0.144483
V258	0.509095	-0.284045
V147	0.50894	-0.202438
V636	0.508887	0.360668
V562	0.508286	0.405531
V714	0.507428	0.387285
V254	0.506604	-0.0115289
V197	0.50563	0.328436
V480	0.503834	0.310813
V136	0.503416	-0.308645
V442	0.503007	-0.272646
V359	0.502883	0.321252
V467	0.502012	0.134554
V606	0.501715	-0.149506
V123	0.501461	0.180662
V429	0.499289	0.22877
V25	0.498852	-0.0153321
V490	0.49853	0.20913
V431	0.498008	-0.204382
V683	0.497922	0.0413213
V14	0.497327	-0.340733
V459	0.497196	-0.148802
V558	0.496844	-0.00528443
V407	0.496839	0.123285
V576	0.49384	0.0838169
V278	0.490364	0.180579
V363	0.490233	0.125234
V485	0.489873	-0.258698
V390	0.489445	0.271336
V674	0.489324	0.334887
V173	0.488724	0.0429824
V594	0.488247	0.431376
V657	0.487792	0.326989
V364	0.486785	0.229777
V408	0.485669	-0.287672
V316	0.485117	0.142088
V653	0.484628	0.483855
V297	0.484607	-0.0166807
V819	0.483022	-0.006752
V568	0.482798	-0.0977236
V477	0.482342	0.338124
V658	0.482222	0.281996
V437	0.480808	0.181804
V831	0.480186	0.281449
V873	0.477513	0.555076
V310	0.477106	-0.354215
V447	0.475107	0.347968
V678	0.47422	0.286244
V186	0.473679	-0.112097
V413	0.473613	-0.246654
V326	0.473103	0.136975
V648	0.472563	-0.359413
V313	0.472406	0.109413
V311	0.471235	0.273227
V602	0.470814	0.117105
V824	0.470678	0.542036
V348	0.470221	-0.101666
V799	0.467778	0.280153
V84	0.467162	0.121493
V377	0.466407	-0.0331209
V247	0.466236	0.111316
V536	0.464799	-0.133192
V565	0.464503	0.243548
V403	0.462469	0.203298
V684	0.462207	0.15554
V119	0.462092	-0.458441
V772	0.461965	-0.0995063
V23	0.461724	-0.0614673
V557	0.461686	0.19775
V629	0.460859	0.277097
V607	0.460473	0.266272
V114	0.459784	8.8983e-05
V751	0.459639	0.19203
V284	0.459505	0.156426
V572	0.458887	0.194749
V737	0.458208	0.594623
V494	0.456881	-0.237704
V643	0.456347	0.362369
V586	0.455276	0.485706
V552	0.454689	-0.0868815
V613	0.449005	0.336901
V451	0.447595	-0.0370835
V638	0.446453	0.207206
V455	0.44587	-0.105876
V424	0.444121	-0.194048
V865	0.443436	-0.307385
V689	0.442905	0.250954
V776	0.439752	0.0458655
V146	0.439254	0.0985038
V545	0.437782	0.226686
V435	0.43713	0.152688
V805	0.436743	0.216579
V717	0.434079	0.0959526
V649	0.433512	-0.413633
V627	0.433344	0.0413629
V189	0.433082	0.108144
V537	0.429415	0.434123
V37	0.427911	-0.252282
V675	0.427282	0.254268
V806	0.426411	-0.335126
V620	0.423971	-0.0668499
V385	0.422295	0.191437
V746	0.422049	0.329345
V298	0.421931	0.0345014
V341	0.419702	0.0498705
V382	0.41885	0.313306
V778	0.418305	-0.239848
V600	0.41828	0.32616
V295	0.418145	0.298404
V700	0.416883	-0.0468927
V650	0.413728	-0.0551829
V599	0.410637	-0.198572
V379	0.410489	0.0554516
V405	0.410293	0.107013
V603	0.409676	0.136574
V626	0.408894	0.119935
V748	0.408337	-0.21687
V240	0.408163	0.305569
V100	0.407249	0.17668
V51	0.40705	-0.136812
V548	0.405916	0.273174
V159	0.405342	-0.033436
V464	0.404696	0.31409
V632	0.401795	-0.115489
V118	0.400453	-0.224257
V569	0.398845	0.249253
V521	0.396187	-0.154241
V512	0.393278	-0.24362
V285	0.393156	-0.294255
V304	0.39282	0.317185
V691	0.389575	0.306909
V24	0.389093	-0.0380038
V546	0.387639	0.235297
V213	0.3875	0.195133
V426	0.387164	0.100247
V329	0.385882	0.0795387
V584	0.38334	-0.358759
V840	0.383336	0.30037
V709	0.380683	-0.0451657
V465	0.380472	0.292583
V832	0.379362	0.238416
V57	0.377174	0.0591211
V635	0.376589	0.235114
V143	0.374603	-0.00416852
V573	0.37453	0.324222
V757	0.370358	0.309123
V789	0.368704	0.092919
V433	0.368513	0.383836
V786	0.368247	-0.160374
V411	0.368006	-0.0171804
V128	0.367219	0.102431
V839	0.366556	0.447019
V679	0.364548	0.430071
V744	0.363004	0.200725
V544	0.362214	0.0791465
V484	0.361831	-0.0151232
V513	0.359995	0.121367
V374	0.359713	0.0200315
V747	0.35934	0.219765
V581	0.359077	-0.168817
V471	0.358909	0.0860174
V802	0.358842	0.235774
V731	0.355737	-0.181431
V486	0.355287	0.391496
V538	0.354906	0.268875
V703	0.354689	0.374587
V787	0.350249	0.306319
V574	0.34737	0.0662341
V233	0.347141	0.0821419
V559	0.346688	-0.0996431
V729	0.344979	-0.308209
V334	0.343442	0.0532419
V192	0.34192	0.244207
V373	0.341703	0.28294
V296	0.341168	-0.0965914
V510	0.339747	0.0506545
V190	0.339716	-0.0131894
V804	0.337182	0.248237
V879	0.336966	0.454614
V428	0.336177	0.112961
V268	0.335281	-0.0620993
V660	0.334655	0.228537
V535	0.334222	0.292375
V825	0.332417	-0.363424
V523	0.332281	-0.116847
V466	0.33078	-0.37616
V651	0.329774	-0.218506
V583	0.329726	-0.05586
V121	0.329235	-0.258578
V342	0.327371	-0.0516422
V479	0.327301	0.127841
V357	0.326706	0.120338
V878	0.325918	0.441423
V134	0.325912	-0.170919
V758	0.324971	0.228024
V750	0.324549	0.0247724
V291	0.323252	-0.152822
V358	0.322486	0.154204
V52	0.321811	-0.0686452
V704	0.319342	0.25628
V312	0.318915	0.0228437
V810	0.316736	0.205787
V812	0.316736	-0.220558
V601	0.316568	-0.249931
V624	0.315976	-0.215524
V734	0.314346	0.268109
V640	0.314282	-0.148916
V418	0.313802	0.141787
V592	0.313567	-0.122745
V736	0.313548	0.180849
V549	0.311726	0.143268
V514	0.311472	-0.140279
V661	0.308277	0.245012
V208	0.307607	-0.0135656
V531	0.306872	-0.278716
V577	0.306397	-0.0283351
V604	0.301266	0.194394
V93	0.29971	-0.00714809
V412	0.29913	0.132544
V216	0.298836	-0.0593412
V561	0.29665	0.00853444
V506	0.296254	-0.114439
V692	0.296222	0.0832425
V398	0.294833	-0.112221
V511	0.293381	-0.154798
V623	0.289952	0.224557
V416	0.285606	-0.0229333
V634	0.285204	-0.20963
V402	0.285009	0.0413548
V571	0.284746	0.0410735
V859	0.281691	0.375988
V670	0.279646	-0.0313406
V242	0.279152	-0.195837
V693	0.278306	-0.316586
V848	0.278137	0.082647
V663	0.277268	0.093706
V570	0.277261	0.129988
V319	0.276945	-0.0799803
V36	0.275358	0.0143167
V811	0.27451	0.186135
V784	0.271338	0.206025
V849	0.270935	-0.244763
V593	0.268648	0.166844
V498	0.266983	-0.255308
V376	0.266509	-0.295982
V867	0.265687	0.173705
V874	0.262901	-0.289501
V685	0.259969	0.12946
V415	0.257416	0.123847
V860	0.256973	-0.0151675
V845	0.256519	0.446539
V813	0.2555	-0.00459673
V225	0.253931	-0.0267918
V438	0.253711	0.216501
V655	0.251655	0.146037
V462	0.250757	0.228915
V533	0.25019	-0.00621425
V880	0.248868	0.166677
V718	0.248417	0.143311
V112	0.248161	-0.177356
V621	0.247811	-0.0788345
V460	0.247729	-0.211711
V716	0.247656	-0.146545
V876	0.247355	0.197359
V618	0.246817	-0.0484056
V801	0.245666	0.0983491
V644	0.245028	0.0719031
V449	0.243945	-0.201824
V686	0.242691	0.0759691
V487	0.242587	0.0100635
V837	0.24153	-0.180155
V245	0.24143	-0.0825128
V705	0.2395	-0.0604776
V617	0.23838	0.0660763
V688	0.238248	0.0992358
V522	0.238006	0.100703
V782	0.23787	0.277955
V841	0.237515	0.169865
V765	0.233431	0.202745
V752	0.231413	0.196153
V761	0.230722	0.0914687
V204	0.229097	-0.0309405
V436	0.224492	0.164515
V195	0.224334	-0.174734
V259	0.224225	-0.154849
V611	0.221817	-0.148357
V345	0.216418	0.0872477
V807	0.214618	0.0205083
V520	0.21363	0.0415136
V605	0.208243	-0.0212322
V882	0.200631	-0.302224
V659	0.200041	-0.0547575
V727	0.197202	-0.0914632
V80	0.194114	-0.174363
V352	0.192876	0.11712
V445	0.191149	-0.110035
V236	0.190281	-0.00016982
V877	0.188759	-0.0940061
V777	0.186833	0.082727
V578	0.182289	0.0975704
V719	0.182006	-0.30458
V282	0.178635	0.00968501
V759	0.177665	0.130842
V732	0.176333	0.0538594
V439	0.175571	-0.0578436
V779	0.17328	-0.164579
V622	0.173121	0.162289
V131	0.167877	-0.012757
V518	0.166223	-0.00971783
V645	0.164263	0.0791134
V406	0.162123	-0.266424
V468	0.161429	0.0405912
V756	0.160032	-0.0140111
V733	0.158581	0.22591
V690	0.156268	0.0662079
V550	0.148163	-0.00327981
V676	0.138797	-0.0949565
V495	0.138109	0.0545455
V340	0.136463	0.0593792
V554	0.135696	-0.113391
V497	0.135571	0.0193716
V846	0.127387	0.080287
V698	0.11363	0.141378
V598	0.108371	-0.166206
V740	0.10639	0.0223178
V721	0.0998321	-0.0178914
V492	0.0946213	0.0249568
V553	0.0855286	-0.00582875
V852	0.082476	0.0878871

## Sheet: posAXvsA
Var ID (Primary)	M3.VIP[1+4+0]	M3.p(corr)[1]
V166	5.81063	0.734757
V792	5.34577	-0.518224
V241	5.32887	-0.519948
V741	5.16584	-0.519246
V31	5.15437	-0.607482
V389	5.0912	-0.508234
V81	4.66026	0.441281
V40	4.02366	0.519633
V16	3.89719	0.592516
V1	3.73483	-0.33521
V18	3.4678	-0.579571
V281	3.32449	-0.245717
V214	3.31895	0.592985
V430	3.20515	-0.22727
V30	3.13568	0.660178
V9	2.93678	-0.401286
V12	2.74685	-0.38775
V34	2.62301	-0.571579
V13	2.6196	-0.455696
V250	2.55367	-0.261529
V39	2.458	-0.458941
V63	2.4362	0.589427
V28	2.39558	0.618503
V10	2.37191	-0.287333
V14	2.36478	-0.439146
V120	2.29488	0.567339
V223	2.25737	0.659543
V720	2.2193	-0.330739
V105	2.18465	0.788058
V64	2.17168	0.211186
V262	2.16856	-0.189402
V253	2.09961	0.765258
V3	2.08231	0.415202
V702	2.07938	-0.184522
V753	2.07704	-0.538041
V221	2.0476	0.629778
V80	2.03307	-0.396404
V397	2.02866	0.844757
V75	2.01228	0.464666
V42	1.99716	0.323166
V110	1.94671	0.214524
V151	1.90566	0.475089
V294	1.89787	0.363642
V289	1.89473	0.297159
V420	1.88793	-0.615887
V67	1.87156	0.380897
V335	1.87071	0.670854
V337	1.86249	0.734605
V2	1.85716	-0.659424
V387	1.84972	0.956693
V163	1.82289	0.367684
V263	1.80888	0.632318
V5	1.80493	-0.263235
V20	1.80065	-0.637309
V384	1.7762	-0.560964
V4	1.73757	-0.517601
V230	1.73318	0.475076
V272	1.7311	0.676059
V222	1.69184	0.566143
V333	1.68441	0.268661
V300	1.6506	-0.259634
V215	1.625	0.548525
V260	1.62422	0.681145
V580	1.61585	0.683835
V108	1.60682	-0.286752
V323	1.60638	0.696366
V590	1.59355	-0.481352
V308	1.59021	0.549685
V170	1.58012	0.415633
V351	1.56676	0.600429
V275	1.56212	0.665774
V364	1.55893	-0.66317
V90	1.53911	0.597056
V29	1.53898	0.586832
V506	1.5374	-0.541675
V854	1.53707	-0.346203
V129	1.5328	0.651101
V35	1.50504	-0.277268
V865	1.45959	-0.615496
V61	1.45196	-0.223373
V697	1.42983	0.523742
V115	1.41384	0.125352
V612	1.38255	-0.295738
V89	1.3813	0.507274
V343	1.37743	0.554388
V800	1.36343	-0.527991
V810	1.35839	-0.382963
V124	1.33686	0.368115
V238	1.33513	0.479827
V117	1.33195	0.207951
V17	1.32393	0.182048
V62	1.31777	-0.746213
V177	1.30912	0.184944
V257	1.30663	0.542459
V707	1.29965	-0.386389
V592	1.29772	-0.224586
V226	1.28825	0.425955
V179	1.28481	0.442846
V44	1.27367	-0.158906
V314	1.26977	-0.488793
V7	1.26542	0.224872
V60	1.26478	0.466577
V32	1.26441	-0.430972
V231	1.26108	0.629081
V50	1.25942	0.156375
V154	1.24835	0.429857
V126	1.24688	0.419674
V529	1.24482	-0.302528
V290	1.24398	0.924342
V22	1.23823	-0.147703
V165	1.23788	0.429613
V94	1.23721	0.449081
V877	1.23368	-0.586437
V220	1.22891	0.789794
V11	1.22709	-0.247059
V324	1.22641	0.646663
V38	1.21913	0.121011
V72	1.215	0.306326
V654	1.19252	-0.298057
V201	1.17969	0.644341
V307	1.17773	0.560358
V26	1.17718	-0.234128
V135	1.17082	-0.122359
V156	1.16998	0.523347
V183	1.15867	0.360746
V286	1.15465	0.672025
V70	1.14601	-0.393627
V132	1.14372	-0.348171
V274	1.14286	-0.100741
V99	1.14139	0.517062
V396	1.13875	0.18624
V491	1.13307	0.1923
V195	1.13299	-0.424981
V808	1.12697	-0.229639
V184	1.12454	0.343519
V378	1.1203	0.58779
V97	1.11204	-0.140506
V584	1.1085	-0.503883
V383	1.10793	0.61905
V339	1.10712	-0.143437
V101	1.10556	0.453785
V45	1.10356	-0.323353
V768	1.10027	-0.460429
V304	1.09942	-0.369289
V627	1.09133	-0.17101
V106	1.08933	0.339212
V180	1.08915	0.325294
V276	1.08809	0.463527
V400	1.08692	0.521641
V409	1.0862	0.416343
V164	1.0768	0.415886
V652	1.06919	-0.570626
V65	1.06919	-0.232517
V86	1.06297	-0.26237
V193	1.05992	0.536458
V665	1.05703	-0.254451
V160	1.05578	0.360009
V683	1.05059	-0.505191
V194	1.04983	0.554031
V444	1.04215	-0.308536
V175	1.03984	0.320905
V392	1.03688	0.531159
V684	1.03528	-0.497222
V306	1.03483	0.671294
V452	1.03275	-0.418471
V606	1.03195	-0.576878
V15	1.02941	-0.251407
V174	1.02426	0.362085
V843	1.01946	-0.258757
V55	1.01945	-0.267946
V71	1.01545	0.426648
V248	1.01054	0.635125
V695	1.0105	-0.266511
V355	1.00735	0.656095
V264	1.00351	0.484075
V372	0.993355	0.47742
V762	0.992943	0.322862
V255	1.99287	0.677319
V139	1.98328	-0.516541
V795	0.977259	-0.424591
V708	0.97422	0.494764
V125	1.97312	-0.604104
V694	0.972859	-0.228673
V394	0.972097	0.475992
V564	0.969376	-0.0915853
V173	0.968033	0.715766
V844	0.96535	-0.123803
V113	0.959906	0.166295
V711	0.957222	-0.0959982
V210	0.957187	0.693104
V575	0.956068	-0.272991
V109	0.956055	0.537294
V287	0.955993	0.858291
V247	0.954426	0.444639
V58	0.953993	-0.252797
V833	0.95183	0.64416
V219	0.948662	0.288655
V6	0.944064	-0.131231
V145	1.94179	0.563393
V361	0.941296	0.59293
V791	0.937802	-0.0150985
V98	0.937651	0.0455974
V419	0.93449	0.454046
V858	0.933437	0.405737
V104	0.932131	0.15358
V155	0.931447	0.381118
V366	0.921841	0.583295
V228	1.92057	0.643713
V284	1.92053	0.74234
V345	0.917858	-0.333326
V534	0.913567	0.449323
V381	0.913166	-0.242812
V710	0.912687	0.441506
V69	0.908715	0.0909442
V277	0.907746	0.583552
V667	0.90357	-0.217779
V103	0.902111	0.135598
V187	0.897836	0.248263
V760	0.892808	0.35708
V25	0.891888	-0.359139
V19	0.890737	0.0647305
V356	0.888016	0.587281
V860	0.88732	-0.221866
V95	0.886721	-0.209354
V167	0.885307	0.489198
V393	0.882144	0.487323
V79	0.880334	0.409267
V365	0.880227	0.682234
V130	0.880208	0.025386
V239	0.879498	0.343191
V568	0.878803	-0.232945
V171	0.877438	0.399618
V111	0.875097	0.636052
V66	0.873339	-0.402518
V454	0.869456	0.589467
V871	0.869048	-0.38675
V395	0.868274	0.752715
V646	0.867337	0.241792
V370	0.865352	-0.354106
V102	0.864242	0.350652
V532	0.862508	0.442223
V140	0.859842	-0.131715
V48	0.853512	-0.162631
V556	0.852403	-0.391827
V205	0.851463	0.550693
V278	0.846979	0.607719
V507	0.84685	-0.435497
V317	0.844866	-0.327814
V347	0.841783	0.0153321
V458	0.836706	0.474794
V243	0.834899	-0.0654312
V252	0.832346	0.178824
V552	0.830953	-0.126422
V162	0.828508	0.0217805
V501	0.828264	-0.102078
V815	0.82713	0.498164
V551	0.826209	0.271004
V150	0.824451	0.665539
V96	0.823723	-0.286842
V826	0.823488	-0.459107
V27	0.821223	-0.00536914
V213	0.816889	0.661184
V246	0.816051	0.420662
V254	0.814837	0.440094
V133	0.814398	-0.224286
V206	0.81289	0.00487436
V178	0.811197	0.333701
V341	0.80846	0.72059
V599	0.805653	-0.351182
V234	0.802144	-0.300755
V498	0.801364	-0.414547
V74	0.80058	0.0709815
V293	0.798761	0.772897
V244	0.798508	0.492886
V628	1.79797	0.556653
V209	0.789389	0.405535
V203	0.788083	-0.430666
V237	0.784326	0.550533
V616	0.782402	-0.295829
V819	0.777667	0.451249
V249	0.77685	0.595017
V360	0.765878	0.479969
V169	1.76509	0.594689
V185	0.763391	-0.11225
V424	0.762944	-0.415519
V474	0.762328	0.48242
V649	0.759299	-0.372525
V54	0.758363	-0.242758
V354	0.755887	0.51806
V814	0.754087	0.386456
V149	0.753327	0.466335
V316	0.751819	-0.338146
V305	0.751809	-0.359582
V199	0.751272	0.20095
V601	0.746813	-0.495141
V77	0.745161	0.239686
V728	0.745093	0.0651784
V283	0.74416	0.679486
V192	0.743566	-0.453673
V233	0.740053	0.51068
V696	0.739748	-0.513417
V423	0.737828	-0.0478554
V647	0.734347	0.285245
V212	0.733034	0.349031
V773	0.732508	-0.116892
V638	0.732065	-0.154932
V137	1.73095	-0.658862
V434	0.730475	0.407209
V328	0.728718	0.431857
V116	0.724139	0.376821
V475	0.721635	0.438661
V388	0.719679	0.395987
V799	0.718055	-0.362417
V457	0.717668	-0.100341
V85	0.715957	-0.208922
V134	0.713489	-0.33871
V47	0.712788	0.102759
V398	1.70801	-0.589319
V59	0.706868	-0.192154
V582	0.706783	0.320977
V92	0.703512	0.16059
V435	0.703485	-0.302759
V153	0.703323	0.739571
V224	1.69388	0.662712
V251	0.689527	0.368006
V565	0.689168	-0.101963
V88	0.686312	-0.28876
V270	0.686054	0.571309
V299	0.685028	-0.10037
V440	0.684424	0.496819
V182	0.683661	0.38061
V127	1.68269	0.583095
V656	0.682343	0.406345
V866	0.681066	-0.288979
V563	0.679984	-0.136769
V271	0.67957	-0.174069
V76	0.679396	0.205855
V332	0.67907	0.537772
V188	0.678549	0.191986
V21	0.678056	-0.169292
V336	1.67736	0.507001
V292	0.67691	0.274039
V432	0.676444	0.0174876
V725	0.676264	-0.189171
V141	0.675567	-0.176694
V51	0.674588	0.44291
V33	0.672105	-0.0897236
V46	0.671242	-0.0816998
V181	0.670584	0.27705
V325	0.669318	0.13842
V523	0.668265	-0.277595
V107	0.66817	-0.138057
V508	0.666845	-0.339548
V136	0.666165	-0.278486
V371	0.665843	0.364353
V469	0.665316	0.683185
V853	0.665221	0.192655
V315	0.66343	-0.241007
V785	0.662811	0.312136
V190	0.662022	0.459397
V138	0.652587	-0.15191
V467	0.652135	0.532131
V84	0.65031	0.0701147
V367	0.65	0.263669
V266	1.64993	0.517831
V100	0.64974	0.373223
V189	1.64885	0.501506
V701	0.648437	0.0743373
V739	1.64778	-0.50641
V822	0.647678	-0.203477
V375	1.64736	0.698989
V369	0.646436	0.552296
V152	0.644817	0.484787
V24	0.642217	-0.413858
V547	0.641112	-0.0375196
V78	0.6405	-0.0678235
V658	0.638838	-0.319643
V856	0.63626	0.349995
V200	0.635315	0.273798
V830	0.633904	-0.297681
V232	0.633805	0.36173
V713	0.631069	0.595663
V797	0.630804	-0.0550806
V453	0.627932	0.026374
V438	0.625762	-0.342778
V406	0.622675	-0.683452
V191	0.622665	-0.0847376
V267	0.621588	0.597746
V157	0.621425	0.206306
V362	0.621293	0.555418
V401	0.619411	-0.115901
V428	0.619011	0.401141
V586	0.618295	-0.347406
V8	0.617372	-0.0335463
V265	0.616693	0.38766
V309	0.616289	0.401994
V699	0.615685	0.362998
V320	0.615416	0.400039
V461	0.614819	-0.206306
V503	0.613373	0.442249
V614	0.612019	-0.185023
V448	0.611743	0.477985
V597	0.610103	-0.279398
V146	0.609957	0.476455
V326	0.60804	0.435742
V399	0.607212	-0.188944
V473	0.606982	-0.292638
V196	0.606408	0.152227
V541	0.60548	-0.253522
V528	0.604566	-0.240138
V407	0.603849	0.317361
V321	0.603605	0.424539
V83	0.602166	0.291539
V377	0.601749	0.369014
V712	0.60085	0.0431831
V442	1.59845	0.537222
V749	0.597539	-0.275496
V198	0.596585	-0.147672
V313	0.596251	-0.223633
V147	0.595667	0.0740905
V280	1.59519	0.600256
V818	0.594443	0.431581
V427	0.592838	0.062711
V476	0.591006	0.0867217
V793	0.590981	0.334532
V857	0.590506	0.0434231
V386	0.589905	0.608682
V629	0.589604	0.505977
V496	0.589018	-0.347875
V500	0.588116	-0.314538
V538	0.587566	-0.357383
V202	0.587545	0.23586
V672	0.585474	0.47841
V159	0.584077	-0.101661
V57	0.582905	-0.194672
V834	0.581583	-0.298197
V143	0.581504	0.377355
V470	0.578834	0.389513
V414	1.57824	0.537382
V93	0.577399	-0.331252
V443	1.57383	0.582161
V338	0.57326	0.193215
V208	0.571135	0.253419
V558	0.571084	0.407884
V158	0.569297	0.0877453
V450	0.565703	0.244021
V322	0.564594	-0.230729
V410	0.560741	0.192848
V176	0.558622	0.331746
V186	1.55861	-0.510831
V128	0.55789	-0.0583432
V279	0.553922	-0.185806
V807	0.553802	-0.227775
V73	0.552395	0.213312
V633	0.550393	-0.291841
V488	0.54921	0.369865
V855	0.548101	0.194564
V489	0.547725	0.319058
V142	0.547499	-0.13972
V576	0.546049	0.355118
V771	0.545774	-0.2555
V851	0.545403	0.407701
V555	0.542242	-0.414064
V207	0.541375	-0.0491107
V236	0.539805	-0.257381
V730	0.539322	0.534987
V131	0.539306	-0.15175
V755	0.539133	0.569145
V480	0.537765	0.512607
V542	0.536977	0.241906
V429	0.535863	0.46627
V621	0.535785	-0.284148
V620	1.53519	0.567269
V87	0.533426	0.115162
V539	0.533319	0.356087
V297	0.532481	0.325846
V595	1.53223	-0.65364
V168	0.531754	-0.133384
V619	0.531665	-0.123347
V240	1.53157	0.537779
V774	0.530458	0.27706
V411	0.5291	0.414013
V43	0.527925	-0.104053
V353	0.524264	-0.164235
V632	0.521601	-0.180893
V779	0.521284	-0.447758
V502	0.520482	-0.465031
V700	0.519677	0.339899
V273	0.519626	0.122906
V56	0.519267	-0.120157
V740	0.519239	-0.23043
V123	0.515499	0.250378
V363	0.514829	0.372278
V350	0.514163	-0.350546
V437	0.513538	0.354297
V269	0.512793	0.27918
V426	0.511578	0.464653
V258	0.510284	0.486024
V735	0.509778	-0.245167
V682	0.508607	-0.272505
V530	0.505907	-0.109284
V742	0.505724	-0.00612122
V334	0.505711	0.40215
V346	0.504998	0.376201
V806	0.503274	-0.401379
V497	0.501584	-0.463489
V425	0.500989	0.448547
V404	0.50053	-0.16392
V850	0.498677	0.343511
V848	0.498665	-0.287616
V37	0.497284	-0.466031
V726	0.495477	0.342826
V587	0.494409	0.462448
V607	0.490887	0.452967
V650	0.490158	0.310342
V227	0.489395	0.266621
V626	0.489328	0.235501
V282	0.489145	0.0357845
V296	0.488385	-0.0207594
V817	0.487458	0.515838
V303	0.486902	-0.17386
V536	0.485806	0.110963
V245	0.485724	0.366276
V639	0.484677	0.42954
V828	0.482303	-0.309383
V505	0.481823	0.155301
V291	0.481112	0.487832
V823	0.479336	-0.428827
V847	2.47876	0.624186
V706	0.477781	0.0790968
V441	0.477747	0.345762
V256	0.477409	0.437936
V464	0.476962	0.413747
V609	0.475886	0.434816
V379	0.475809	0.388449
V330	0.474633	0.245008
V53	0.473425	0.2087
V548	0.471402	0.431077
V415	0.469588	-0.18592
V204	0.469243	-0.139532
V864	0.469225	0.11445
V789	0.468558	0.286342
V569	0.467553	-0.293013
V403	0.466844	0.185828
V229	0.464593	0.0803164
V577	0.463702	-0.158719
V816	0.462511	-0.0812525
V385	0.462497	-0.109017
V738	0.462338	0.0804506
V798	0.461338	0.169657
V560	0.453935	-0.31716
V504	0.451096	-0.125022
V525	0.451015	0.326939
V91	0.450458	-0.263165
V589	0.447175	0.214199
V513	1.44669	0.587718
V852	0.446659	-0.632835
V825	0.446457	-0.512196
V421	0.444964	-0.327804
V242	0.442661	-0.188556
V431	0.442157	0.286912
V641	0.441849	0.0526476
V235	0.441516	0.287804
V687	0.438532	0.392927
V631	1.43751	0.680892
V608	0.433458	0.269567
V288	0.433185	0.408269
V677	0.431201	0.491454
V412	0.4291	0.405529
V709	0.429013	0.430636
V780	0.428414	0.134262
V603	0.428097	0.27588
V302	1.42777	-0.592289
V845	1.4277	-0.559731
V796	0.427273	-0.36381
V342	0.42453	0.0723267
V471	0.423801	-0.214332
V172	0.423617	-0.277542
V68	0.4212	-0.157368
V598	0.418693	-0.578431
V327	0.4161	0.372374
V566	0.414966	0.210736
V161	0.414528	0.311176
V295	0.413997	0.346186
V526	0.413143	0.271393
V527	2.41124	-0.501565
V881	0.410812	-0.532834
V688	0.409159	-0.123011
V868	0.408617	0.131492
V673	0.408523	0.102296
V373	0.406934	-0.296528
V41	0.406325	-0.0880255
V537	0.405759	-0.257318
V572	0.40133	0.281145
V481	0.400809	0.379756
V487	0.400146	0.407924
V775	0.397534	0.209402
V486	0.394329	-0.348892
V211	0.39411	0.122287
V82	1.39367	0.520098
V357	0.39272	0.30262
V455	0.391606	0.307093
V148	0.391359	-0.272238
V217	0.391223	-0.114554
V524	0.390831	0.191782
V390	0.390089	0.0242062
V516	0.389894	-0.104209
V829	0.389339	-0.613137
V144	0.388427	0.269544
V268	0.386757	0.36966
V674	0.385676	0.271219
V602	0.383272	0.183342
V422	0.382566	-0.33677
V466	0.382418	-0.449873
V485	0.382291	0.435167
V630	0.376216	-0.190941
V417	0.376146	-0.0306094
V668	0.373486	0.264343
V331	0.371965	0.362261
V405	0.371585	0.413061
V418	0.371439	-0.224441
V482	0.370455	0.131204
V863	0.367035	-0.582237
V531	0.366909	-0.303158
V869	0.364195	0.111044
V521	0.362953	-0.11311
V870	0.362726	0.0582946
V678	0.362394	0.295005
V770	0.362246	-0.262583
V769	1.36164	-0.517988
V545	0.361328	0.312822
V546	0.360835	0.393466
V310	0.357476	-0.288835
V446	0.357356	-0.137014
V659	0.357221	-0.359149
V717	0.356992	0.186653
V731	0.354836	0.404077
V788	0.35447	-0.387954
V358	0.354111	0.00598344
V408	0.353257	0.333542
V478	0.353227	0.12438
V261	0.352684	0.236425
V615	0.351957	0.398169
V862	0.351937	0.224954
V114	0.351038	-0.239453
V835	0.349521	0.361155
V625	0.348632	0.320709
V311	0.348293	-0.0301755
V23	0.34579	0.0354376
V754	0.345197	-0.553934
V349	0.345095	0.260347
V510	0.339953	0.231108
V724	0.339839	0.389281
V636	0.337145	0.350985
V691	0.33617	0.358788
V781	0.335186	-0.138174
V402	0.334946	0.301451
V456	0.333646	0.375853
V544	0.332912	0.21002
V517	0.332186	0.42919
V766	0.331158	-0.560993
V675	0.330553	0.344822
V794	0.329402	0.27095
V329	0.328929	0.285699
V867	0.328918	-0.256091
V479	0.323532	0.35475
V484	0.323434	0.35391
V447	0.322678	0.259143
V483	0.322003	-0.137544
V821	0.321878	-0.304789
V468	0.32046	0.107985
V460	0.320372	-0.444521
V644	0.319728	-0.0822196
V567	0.317492	-0.208574
V593	0.315908	0.0184263
V790	0.315645	-0.532613
V778	0.315173	-0.243564
V861	0.315132	0.387462
V732	0.314964	0.20786
V49	0.314833	0.190373
V118	0.313513	0.145873
V512	0.313176	-0.375981
V827	0.313168	0.250744
V662	0.312917	-0.429176
V849	0.312806	-0.546287
V761	0.312373	-0.121968
V559	0.311399	0.169563
V374	0.311258	0.165927
V748	0.310648	-0.260558
V285	0.310183	0.376219
V637	0.310034	0.296967
V451	0.309604	-0.241071
V472	0.308453	0.0234393
V340	0.306626	-0.0596904
V767	0.305685	-0.423366
V704	0.305274	0.336562
V225	0.304179	0.160364
V669	0.30352	0.131236
V809	0.302858	-0.240556
V723	0.30278	0.399764
V610	0.302749	0.0172612
V359	0.299816	0.133495
V786	0.299655	0.263781
V721	0.299586	-0.525676
V540	0.298268	-0.286233
V736	0.297578	-0.26591
V122	0.29608	0.104298
V882	0.29491	-0.481096
V841	0.294773	-0.0938642
V666	0.294696	0.0380442
V344	0.294481	0.135811
V549	0.293119	0.275957
V600	0.291166	-0.0900685
V836	0.29002	0.326817
V499	0.288506	0.0930575
V715	0.286693	-0.0951079
V719	0.286299	-0.470875
V671	0.286213	0.251762
V722	0.283895	0.343351
V465	0.2835	0.324512
V757	0.282813	-0.0931551
V613	0.282173	-0.0486125
V596	0.281966	0.271256
V571	0.279802	0.247634
V391	1.27956	-0.684213
V570	0.279103	0.247238
V744	0.278996	-0.184322
V746	0.276156	0.282157
V319	0.275993	-0.0381913
V604	0.27588	0.176917
V873	0.275795	-0.100504
V459	0.273672	0.303949
V805	0.273418	0.229215
V477	0.273002	0.145273
V380	0.27243	-0.335477
V875	0.271346	0.283905
V743	0.27072	0.243205
V259	0.270198	-0.219981
V872	0.269414	0.179508
V348	0.268911	-0.107944
V804	0.268519	0.284186
V318	0.266441	-0.0944244
V121	0.263618	-0.321262
V635	0.261185	0.287885
V463	1.26016	0.573208
V776	0.259772	-0.124649
V36	0.258923	0.183743
V693	0.258108	-0.403437
V509	0.25774	-0.0531681
V703	0.256895	0.320699
V745	0.256308	-0.00263132
V657	0.255945	-0.0996977
V578	0.255141	-0.162597
V681	0.252937	-0.380329
V750	0.251546	0.123498
V690	0.250588	-0.00909251
V689	0.249887	0.0287977
V660	0.249663	0.258434
V583	0.248854	-0.230682
V519	0.245648	-0.0565341
V645	0.244899	-0.321321
V585	0.244865	-0.225475
V439	0.244018	0.310588
V832	0.243181	-0.100576
V413	0.239878	0.264734
V218	0.239449	0.0853359
V112	0.237917	-0.11974
V368	2.23693	0.562665
V686	0.234753	-0.0497868
V581	0.234728	0.167522
V643	0.232918	0.0978947
V382	0.231159	0.0311413
V561	0.230019	-0.105924
V756	0.22893	-0.26493
V655	0.22595	0.229987
V874	0.225798	-0.354233
V301	0.224256	-0.0696813
V751	0.223063	-0.0924701
V492	0.220883	0.157445
V759	0.220096	-0.353381
V676	0.219652	-0.230629
V634	0.219294	-0.0735157
V554	0.219143	-0.256855
V594	0.218733	0.243725
V119	0.215975	-0.0460043
V838	0.215669	0.0785394
V490	0.214747	0.0889395
V842	0.214174	-0.041848
V550	0.212468	-0.365294
V846	0.211471	-0.328516
V803	0.210387	0.234831
V648	0.208535	-0.267088
V714	0.208376	-0.186948
V312	0.207995	0.0463664
V515	0.206885	0.219856
V831	0.2039	0.180307
V605	0.202915	-0.0690979
V758	0.202813	0.21929
V557	0.200893	0.0481671
V813	0.200621	-0.148591
V664	0.200407	0.157616
V698	0.198436	-0.313126
V436	0.198045	-0.0601903
V543	0.197476	0.0328113
V840	0.196726	-0.204546
V734	0.196108	-0.05256
V663	0.196103	-0.158964
V494	0.195943	0.0322373
V727	0.193998	0.252841
V52	0.193248	-0.0882975
V376	0.192306	-0.0279334
V535	0.190768	0.0482209
V573	0.190703	0.184308
V588	1.19034	-0.569148
V784	0.19002	0.15127
V520	0.189443	0.0605512
V876	0.184749	0.19215
V661	0.183794	0.039699
V617	0.180533	0.1835
V518	0.180141	-0.171047
V642	0.180017	-0.020826
V772	0.179303	0.128725
V462	0.178778	0.203369
V765	0.178742	0.0204628
V820	0.178641	0.110239
V783	0.17819	-0.204959
V747	0.178101	-0.086483
V562	0.177365	-0.0426755
V298	0.175958	-0.0933108
V812	0.175195	0.0762451
V197	0.174397	-0.0677307
V493	0.174006	-0.2817
V763	0.173875	0.13598
V416	0.171918	0.229937
V685	0.171897	0.178419
V622	0.170561	-0.0264569
V859	0.170092	-0.120875
V624	0.168291	-0.167119
V216	0.167056	0.0755393
V553	0.163082	0.0504046
V670	0.162204	-0.155177
V511	0.161957	-0.100832
V611	0.161858	-0.153933
V692	0.161172	0.169913
V716	0.161056	-0.111996
V495	0.161042	0.191488
V653	0.15858	0.172385
V579	0.157505	-0.0633175
V449	0.157376	0.0924437
V352	0.156429	0.0619777
V729	0.153178	0.0917861
V878	0.150955	0.0695349
V533	0.149715	0.0260739
V787	0.149164	0.00901601
V618	0.147594	0.0339671
V623	0.14729	0.046001
V718	0.146796	0.0775116
V737	0.14634	-0.199295
V879	0.145002	-0.112955
V574	0.144521	0.135489
V679	0.142265	-0.175732
V782	0.14158	-0.199271
V837	0.140323	-0.115868
V733	0.139049	-0.195705
V752	0.136555	0.0380304
V764	0.130095	-0.0598599
V777	0.125854	-0.121762
V651	0.125006	-0.165739
V640	0.123637	0.032723
V680	0.123181	-0.0744646
V705	0.119697	-0.166336
V591	0.116184	0.0725102
V433	0.112013	0.0397116
V839	0.111372	0.0758812
V802	0.108502	0.102051
V514	0.106869	0.0486595
V811	0.10403	-0.0239029
V445	0.103998	0.026184
V880	0.0998426	0.0907163
V801	0.0846595	-0.010786
V824	0.0616616	-0.072138
V522	0.05799	-0.0731182

## Sheet: negAXvsX
Var ID (Primary)	M3.VIP[1+4+0]	M3.p(corr)[1]
V33	6.3962	0.256624
V290	6.0429	-0.158231
V13	5.38303	0.198833
V89	3.72982	0.394924
V246	3.17049	-0.0237072
V4	3.0779	0.256314
V477	2.99786	0.225016
V380	2.68557	0.47018
V36	2.67492	-0.597773
V328	2.60771	-0.117043
V610	2.60364	0.562508
V568	2.38999	0.376454
V9	2.38265	0.213128
V8	2.36141	0.2356
V190	2.33987	0.403478
V128	2.33226	-0.360462
V101	2.26284	-0.662776
V382	2.24793	-0.0239759
V420	2.17534	0.325052
V451	2.11318	-0.30586
V6	2.08789	0.723726
V374	2.05829	-0.216964
V227	2.05829	-0.463603
V258	2.02828	-0.522302
V537	2.02174	0.301537
V331	2.01838	0.198852
V198	1.98674	-0.582246
V379	1.97143	-0.101527
V14	1.94291	-0.281588
V211	1.92536	-0.421365
V30	1.92177	0.21482
V146	1.90219	-0.374791
V221	1.89136	0.280454
V193	1.8798	-0.245808
V475	1.82719	-0.253691
V130	1.80988	-0.385267
V15	1.77556	-0.293003
V64	1.76999	-0.372837
V422	1.76891	-0.319411
V35	1.76675	-0.481585
V28	1.75053	-0.173572
V763	1.72188	-0.546609
V42	1.71936	-0.343021
V49	1.71019	0.296959
V317	1.70467	-0.528024
V195	1.70359	-0.374759
V23	1.70021	0.551488
V739	1.69401	0.561783
V332	1.68317	0.218079
V164	1.67732	-0.517795
V452	1.67635	-0.136639
V325	1.66298	0.254796
V565	1.65633	-0.295182
V192	1.65249	0.0644413
V689	1.64895	-0.247092
V205	1.64021	-0.503527
V115	1.63896	-0.347929
V740	1.63221	-0.213135
V658	1.62928	-0.273112
V126	1.62864	-0.329092
V113	1.62289	-0.342032
V18	1.62235	-0.357705
V478	1.61353	0.46958
V72	1.61123	-0.363529
V43	1.59291	-0.255468
V495	1.59021	0.312133
V518	1.58583	0.369766
V701	1.58367	-0.166165
V266	1.58174	-0.195486
V381	1.56563	0.223002
V679	1.5656	0.19519
V575	1.5519	0.348159
V453	1.53437	0.406971
V425	1.52989	-0.319482
V157	1.52256	-0.581406
V450	1.51863	-0.0925251
V92	1.51224	-0.294658
V114	1.50522	-0.305448
V248	1.49463	-0.274308
V262	1.49076	0.338802
V681	1.48635	0.224289
V337	1.46883	-0.229405
V663	1.46738	-0.356505
V199	1.46505	-0.436393
V188	1.45921	0.381007
V762	1.45643	0.160389
V90	1.45493	0.438038
V283	1.45394	0.405793
V63	1.44687	-0.35845
V80	1.44002	0.45138
V566	1.43965	0.345709
V341	1.43111	-0.641799
V247	1.41906	0.183678
V467	1.41899	-0.499709
V29	1.41744	-0.275249
V25	1.40612	0.38016
V542	1.40001	0.156441
V303	1.39994	-0.100918
V367	1.38385	0.415983
V373	1.38285	-0.20037
V540	1.37892	0.37531
V311	1.37163	-0.0758783
V209	1.36114	-0.477745
V322	1.35975	-0.0122427
V206	1.35677	-0.459368
V333	1.35544	0.0603854
V147	1.3518	-0.583346
V370	1.34711	0.370862
V127	1.34526	-0.381394
V292	1.34387	0.162159
V148	1.3378	-0.380001
V204	1.33357	-0.300867
V608	1.33074	0.326762
V335	1.32513	-0.35431
V342	1.32482	0.41666
V682	1.32433	0.278636
V251	1.31272	-0.30131
V284	1.30892	0.326704
V426	1.2995	-0.271992
V685	1.29949	0.2544
V129	1.29051	-0.342449
V517	1.28851	0.251855
V176	1.28572	-0.442632
V288	1.27478	0.361839
V74	1.26243	-0.408026
V224	1.26149	0.440474
V716	1.25742	0.097459
V446	1.25428	0.262482
V723	1.24899	-0.382469
V308	1.24487	-0.444234
V163	1.24201	-0.491768
V236	1.23768	-0.359802
V59	1.23529	0.665246
V761	1.23061	0.325911
V81	1.22213	0.284399
V419	1.22136	0.0807495
V239	1.21517	0.546394
V12	1.20866	0.472944
V456	1.20162	-0.308183
V196	1.19958	-0.24491
V250	1.1972	-0.412694
V538	1.19314	0.138333
V31	1.19278	-0.228887
V96	1.18602	-0.38397
V472	1.18462	-0.307595
V703	1.17393	0.413456
V586	1.1659	0.32022
V155	1.16577	-0.385255
V397	1.15851	-0.0547584
V340	1.14682	0.608364
V194	1.14529	0.288156
V97	1.14047	-0.333339
V355	1.12996	0.0115919
V369	1.12805	0.283518
V69	1.12464	0.614646
V240	1.12349	0.33025
V181	1.11138	-0.502056
V554	1.10373	-0.382226
V549	1.10143	-0.241129
V361	1.09857	0.343967
V280	1.09234	0.47565
V402	1.09049	0.116213
V179	1.08935	-0.392228
V560	1.08827	0.250427
V78	1.08747	0.47347
V38	1.07561	-0.257515
V514	1.07414	0.251705
V418	1.07373	-0.206699
V591	1.07038	0.260395
V86	1.06955	-0.445062
V37	1.06925	-0.446307
V11	1.06697	0.432267
V203	1.06498	-0.296131
V666	1.06385	-0.319395
V58	1.06332	-0.367976
V210	1.05856	-0.363475
V79	1.05557	0.337385
V722	1.05516	0.513269
V503	1.05363	-0.459589
V228	1.05137	0.348719
V490	1.04958	0.21973
V569	1.04945	0.317426
V186	1.04855	-0.292228
V581	1.04821	-0.525867
V592	1.04365	0.173879
V242	1.04303	0.286899
V73	1.04191	-0.395486
V24	1.04142	-0.193427
V151	1.03601	-0.390134
V473	1.03269	-0.0547618
V117	1.03183	-0.345321
V180	1.03115	-0.363707
V184	1.02982	-0.629792
V504	1.02441	-0.27448
V309	1.01993	0.314302
V123	1.01832	0.300306
V132	1.01282	-0.271895
V118	1.00727	-0.345354
V732	0.998138	0.254828
V22	0.997131	-0.270388
V642	0.995918	-0.834285
V183	0.98559	-0.286916
V696	0.985175	0.294472
V88	0.980075	-0.271794
V214	0.979764	-0.182298
V310	0.978872	-0.160395
V368	0.977915	0.347425
V82	0.977804	0.307955
V601	0.976065	-0.384284
V599	0.972089	-0.244325
V509	0.967463	0.387393
V548	0.962728	0.272324
V323	0.961384	0.00888757
V156	0.960527	-0.345645
V633	0.954556	-0.353859
V275	0.95425	0.385153
V216	0.949022	-0.246377
V432	0.947407	0.241648
V476	0.945152	0.184325
V102	0.933386	-0.413453
V61	0.932591	-0.332945
V471	0.924607	-0.470418
V669	0.922015	-0.0266808
V177	0.919802	-0.401506
V698	0.918973	0.292369
V312	0.911728	0.0309943
V298	0.910814	0.507798
V604	0.910285	-0.464235
V83	0.909069	0.319715
V201	0.907763	-0.303178
V300	0.906876	-0.340075
V77	0.906288	-0.426386
V534	0.900981	0.382853
V350	0.900672	-0.120387
V54	0.897678	0.544075
V359	0.894949	-0.291646
V510	0.893564	0.530209
V376	0.887662	-0.436449
V187	0.886847	-0.477464
V68	0.885831	-0.220676
V528	0.88275	0.558914
V165	0.880716	-0.3535
V329	0.879437	-0.0553136
V279	0.879273	0.339211
V521	0.878652	-0.285912
V480	0.87851	0.364962
V677	0.877652	-0.437817
V1	0.876733	-0.301794
V257	0.873515	-0.321711
V405	0.872858	-0.19266
V241	0.871916	0.360451
V410	0.869058	0.418372
V683	0.868548	0.508073
V474	0.867297	-0.0207228
V434	0.86568	0.300229
V673	0.861399	-0.394142
V137	0.85928	-0.0741586
V731	0.857985	0.587829
V260	0.856329	0.29158
V662	0.855163	-0.562831
V515	0.845856	0.230392
V67	0.845298	-0.233947
V285	0.84352	0.283442
V449	0.839131	-0.0179228
V487	0.83891	-0.312627
V314	0.837875	-0.2118
V606	0.834086	-0.190433
V343	0.833771	-0.143406
V469	0.833105	0.72351
V544	0.833039	0.511304
V436	0.829837	0.574769
V646	0.827808	-0.195429
V75	0.821567	-0.395714
V99	0.819468	-0.186239
V56	0.816895	0.228679
V26	0.815728	0.341423
V152	0.814946	-0.147442
V461	0.809256	-0.236167
V121	0.808219	-0.0747117
V470	0.807166	0.230572
V741	0.804788	0.580436
V281	0.80427	-0.292872
V392	0.803078	-0.168933
V55	0.80092	0.2598
V455	0.799157	0.156104
V168	0.796024	-0.368182
V443	0.793106	-0.458828
V607	0.790361	0.248676
V276	0.785718	0.0972092
V583	0.781253	-0.328547
V500	0.781181	0.289723
V457	0.781085	-0.264755
V567	0.781083	0.0753296
V754	0.779062	0.578773
V417	0.775573	0.0787101
V219	0.774716	-0.0985157
V435	0.77435	-0.417294
V106	0.772072	0.0644864
V259	0.769529	-0.00913319
V383	0.766523	0.201453
V661	0.764465	-0.131225
V574	0.76237	0.187764
V751	0.762271	-0.519241
V401	0.762063	0.0246343
V645	0.76155	0.220767
V111	0.758887	0.136126
V578	0.757928	-0.0694413
V95	0.756774	-0.0265292
V404	0.755986	-0.165363
V293	0.755608	0.108597
V609	0.755008	-0.0560018
V208	0.754953	-0.122491
V330	0.754269	-0.0937784
V720	0.753383	0.555479
V107	0.751304	0.0712818
V299	0.749764	-0.219773
V267	0.749448	0.434342
V134	0.744935	-0.164922
V302	0.738104	0.0917744
V324	0.734581	-0.361584
V182	0.726877	-0.290621
V158	0.72626	-0.44132
V93	0.724942	-0.158113
V243	0.723497	0.396509
V200	0.721131	0.277575
V717	0.720887	-0.229159
V525	0.719974	-0.107431
V615	0.719273	-0.320816
V523	0.714675	-0.289003
V144	0.714515	0.333713
V770	0.713542	0.2196
V189	0.710707	0.377578
V135	0.709434	-0.171717
V492	0.709184	0.339621
V7	0.707268	0.21259
V212	0.706553	-0.18844
V213	0.70602	-0.316886
V619	0.705951	-0.515934
V304	0.703575	0.435447
V648	0.702084	-0.551606
V539	0.70045	-0.132899
V272	0.698896	-0.0117027
V643	0.698312	0.193505
V625	0.697771	0.108326
V386	0.696638	-0.220946
V245	0.695953	-0.352933
V268	0.690291	-0.164038
V202	0.687494	-0.161754
V533	0.685744	-0.336354
V270	0.683596	-0.130312
V87	0.680472	-0.297575
V185	0.677024	-0.348564
V403	0.673307	0.0571323
V384	0.673096	0.242692
V47	0.671747	0.0582045
V39	0.668903	0.0615016
V110	0.665553	0.0297114
V345	0.665359	0.1961
V100	0.663727	0.155849
V230	0.662539	-0.27938
V51	0.657143	-0.22163
V62	0.657047	-0.224389
V238	0.656474	-0.153647
V563	0.655589	-0.186786
V398	0.654745	-0.00521799
V215	0.65293	0.220016
V45	0.651342	-0.364966
V570	0.65105	0.458674
V529	0.650791	-0.252425
V365	0.645197	0.0108043
V141	0.644374	-0.106727
V319	0.642066	-0.126331
V580	0.639611	0.485271
V3	0.639235	0.136021
V282	0.638402	0.463119
V421	0.636428	-0.212264
V494	0.636284	-0.289639
V122	0.634943	0.0114164
V339	0.634253	0.103273
V407	0.633788	-0.319061
V291	0.632924	0.0172231
V747	0.630035	-0.290604
V641	0.629857	-0.511501
V159	0.629093	-0.158111
V124	0.628957	-0.313349
V131	0.62412	-0.233846
V377	0.622948	-0.252497
V595	0.621866	0.204816
V774	0.61802	0.55833
V408	0.617917	0.0340403
V60	0.616917	-0.0868762
V207	0.616221	0.0376638
V17	0.614839	0.283658
V34	0.614509	-0.255979
V109	0.613959	0.249417
V315	0.612182	-0.112813
V550	0.61174	-0.182642
V143	0.611271	0.207494
V53	0.610639	0.00966009
V166	0.610308	-0.265531
V21	0.607431	-0.122462
V635	0.60493	0.474915
V594	0.604876	0.327689
V577	0.604667	0.173
V505	0.60401	0.220478
V231	0.602795	0.221401
V647	0.602064	0.185971
V590	0.601132	0.083334
V459	0.60091	0.214126
V19	0.600575	0.0195421
V160	0.60055	-0.422239
V668	0.599739	0.501899
V153	0.59799	-0.12226
V616	0.59746	0.41002
V94	0.597182	0.051717
V98	0.596191	-0.104348
V108	0.595242	-0.132363
V354	0.59139	-0.0834123
V286	0.590293	0.387223
V264	0.590254	-0.0876484
V218	0.589892	-0.207821
V767	0.588298	-0.100325
V748	0.587218	-0.101049
V364	0.586394	0.22289
V112	0.585028	0.0518474
V150	0.583693	-0.157484
V5	0.583294	-0.312317
V440	0.581969	-0.266338
V755	0.581883	-0.28795
V277	0.581807	0.285862
V562	0.580691	0.178026
V346	0.579675	-0.410888
V728	0.577975	0.46206
V532	0.576505	0.32228
V712	0.576242	0.369854
V584	0.576056	-0.507347
V334	0.575819	0.032968
V439	0.575404	-0.175508
V70	0.573788	-0.0839802
V399	0.571956	0.176218
V738	0.571345	-0.221383
V366	0.570842	-0.472942
V406	0.568272	0.208313
V71	0.566634	-0.201435
V336	0.565856	0.0924755
V278	0.564842	0.177
V136	0.564575	-0.0867889
V531	0.561742	-0.211533
V52	0.561637	0.137116
V234	0.560238	-0.207065
V104	0.560153	0.261323
V654	0.560121	0.202328
V20	0.559193	-0.197556
V488	0.558202	-0.236813
V527	0.553699	-0.237269
V10	0.553534	0.318106
V50	0.552729	-0.137844
V499	0.548323	0.376168
V105	0.547728	-0.177359
V125	0.54642	-0.0288009
V320	0.545293	0.0772455
V142	0.544436	0.0275941
V347	0.544093	0.22356
V454	0.543009	0.0116434
V442	0.542979	-0.377347
V502	0.54257	0.0193551
V664	0.541489	0.205973
V522	0.540769	0.303818
V116	0.534727	0.166994
V657	0.533111	-0.161928
V746	0.532773	-0.304906
V670	0.532691	-0.185186
V44	0.532357	-0.102818
V387	0.532315	-0.210316
V659	0.532121	-0.0722895
V395	0.531082	0.169306
V269	0.531078	-0.308019
V428	0.528847	0.0689697
V120	0.527423	0.187291
V725	0.527217	0.516148
V237	0.527156	0.396198
V614	0.526824	0.241247
V512	0.525119	0.277351
V140	0.523602	0.00913741
V294	0.52323	-0.322054
V222	0.523179	0.28267
V724	0.522266	0.380921
V252	0.521976	0.144347
V680	0.521721	-0.0215473
V769	0.520282	-0.44826
V338	0.520046	0.236077
V571	0.520014	0.311767
V582	0.519039	-0.243359
V702	0.518004	0.106101
V551	0.517729	-0.418946
V138	0.517623	-0.07795
V400	0.517265	0.215023
V460	0.517086	0.225309
V622	0.517033	-0.228155
V413	0.516958	0.241018
V424	0.516316	0.296214
V375	0.514484	-0.0704
V139	0.513536	-0.08399
V612	0.513516	-0.402807
V493	0.513452	-0.209674
V409	0.512589	-0.421942
V76	0.512534	-0.248855
V624	0.511385	0.442206
V536	0.510016	-0.0364849
V735	0.509426	-0.0829637
V233	0.509128	0.23373
V297	0.508332	0.00538325
V103	0.507309	-0.42902
V721	0.507136	0.208117
V220	0.506827	-0.226672
V178	0.505583	-0.223112
V411	0.50505	0.297239
V119	0.504012	-0.279271
V771	0.503235	-0.0914707
V40	0.502997	-0.0297531
V629	0.501726	0.196499
V655	0.500544	-0.231198
V433	0.499315	0.092043
V348	0.497967	-0.224454
V558	0.496786	0.272829
V589	0.49515	0.0424256
V154	0.494775	0.0787999
V430	0.494009	0.390324
V162	0.492263	0.0202807
V653	0.492195	-0.0347108
V351	0.491399	-0.0356123
V621	0.490979	-0.178789
V697	0.489199	0.244735
V145	0.488751	-0.0298068
V719	0.48375	-0.103337
V491	0.482148	-0.0251171
V385	0.481521	0.189028
V552	0.480083	0.17161
V16	0.479161	0.0512677
V84	0.477756	0.258211
V737	0.477573	0.270826
V623	0.477141	0.0682121
V175	0.47669	-0.0890309
V636	0.476082	-0.36778
V618	0.475655	-0.310781
V707	0.475332	-0.112744
V362	0.473747	0.188521
V519	0.46947	-0.260153
V627	0.469372	-0.348166
V263	0.469287	-0.294103
V600	0.468035	-0.0429389
V729	0.466948	0.4146
V644	0.465536	0.100859
V481	0.464144	0.189375
V468	0.464062	-0.363857
V520	0.462678	-0.319616
V665	0.460925	-0.214965
V295	0.458221	0.259436
V671	0.457746	0.415315
V149	0.453666	-0.154674
V466	0.453652	0.212357
V232	0.452845	-0.202833
V764	0.452496	-0.323717
V511	0.451335	-0.547235
V301	0.449127	0.252102
V229	0.447708	0.0893018
V352	0.447573	0.18602
V526	0.445622	-0.132274
V651	0.444256	-0.474986
V765	0.441678	-0.459545
V412	0.43789	0.285682
V415	0.436587	0.291656
V57	0.436092	-0.127465
V318	0.434494	-0.0869522
V85	0.434288	0.137763
V559	0.433827	0.0113238
V660	0.43194	-0.0960193
V675	0.431458	-0.192772
V394	0.430209	0.00690068
V167	0.428409	-0.216181
V171	0.426244	0.123899
V274	0.423993	-0.182806
V416	0.422907	0.198068
V91	0.422762	-0.124621
V249	0.422709	0.251571
V727	0.422582	0.0281627
V226	0.421856	-0.0561884
V191	0.420885	-0.332893
V169	0.419136	-0.179509
V161	0.419012	-0.25482
V700	0.416359	0.0409285
V484	0.415658	0.0707326
V393	0.414213	-0.230908
V326	0.414075	0.0909429
V506	0.412488	0.388578
V507	0.41027	-0.279777
V699	0.409395	-0.19793
V687	0.409369	-0.242993
V706	0.409059	0.335367
V483	0.408859	0.198309
V736	0.406102	-0.0693589
V363	0.404962	0.251613
V170	0.404829	0.142406
V253	0.404647	-0.0337159
V541	0.403636	-0.00629336
V773	0.4033	0.220898
V596	0.401297	-0.232187
V261	0.398447	-0.245674
V225	0.398383	0.170002
V353	0.396618	-0.0970795
V437	0.396608	0.218052
V652	0.395781	-0.1341
V772	0.393826	-0.163905
V752	0.392485	0.24615
V760	0.391763	-0.0630825
V579	0.390621	0.206826
V235	0.389662	-0.162269
V486	0.38656	0.0192302
V46	0.385762	-0.0333699
V27	0.384923	0.0447194
V613	0.384878	0.133084
V287	0.383647	-0.0810115
V715	0.382924	-0.000510704
V273	0.381207	-0.0470261
V378	0.381156	0.0333802
V32	0.381058	0.0106206
V296	0.38065	0.0616458
V650	0.378867	-0.240351
V693	0.378521	0.419762
V508	0.377593	-0.254269
V313	0.374709	0.019038
V65	0.372814	-0.113226
V501	0.370707	0.168064
V649	0.367439	0.257517
V41	0.366656	-0.0308456
V414	0.361704	-0.014528
V674	0.36073	-0.158526
V768	0.359665	-0.0836974
V172	0.357401	0.0182745
V684	0.355282	-0.271153
V628	0.354915	0.17716
V734	0.354182	0.0498169
V758	0.353624	0.244505
V632	0.352835	0.255519
V265	0.351036	-0.119735
V344	0.350696	0.113568
V445	0.349996	-0.252595
V447	0.349334	-0.139124
V396	0.348509	0.0740387
V223	0.348411	0.0844875
V305	0.344851	-0.0264653
V713	0.344782	-0.213881
V686	0.344663	0.189715
V573	0.3441	0.136861
V66	0.343939	0.175379
V711	0.343329	-0.199751
V360	0.343124	-0.0376043
V289	0.341865	0.170605
V545	0.341565	0.210167
V547	0.3414	-0.0349673
V708	0.339625	-0.010848
V757	0.337974	-0.151729
V585	0.337499	0.245236
V555	0.33707	-0.210414
V465	0.336548	0.144494
V516	0.336512	0.243503
V513	0.336289	0.0345245
V745	0.336226	0.211267
V546	0.334953	-0.256964
V639	0.334086	-0.425304
V496	0.333782	0.289531
V173	0.333262	-0.105536
V733	0.333167	0.251655
V463	0.331546	0.103098
V357	0.331362	-0.119666
V48	0.329921	0.0281692
V389	0.326738	0.131681
V691	0.321731	-0.267849
V197	0.318764	-0.13424
V626	0.317658	-0.146422
V690	0.317568	0.0896994
V598	0.312882	-0.219883
V676	0.309765	0.156134
V254	0.306279	0.0116176
V482	0.305675	0.102512
V743	0.305437	0.24145
V576	0.30077	0.195185
V756	0.299715	-0.331842
V543	0.299459	0.0224064
V656	0.299408	0.195773
V631	0.298452	-0.197351
V688	0.298152	0.340542
V371	0.297807	-0.0155705
V244	0.297168	0.110478
V423	0.296713	0.0968398
V588	0.295237	-0.0837175
V602	0.291894	-0.129179
V458	0.291241	0.114376
V174	0.291207	0.104014
V561	0.289263	0.146831
V497	0.288003	-0.100145
V2	0.286743	-0.074316
V603	0.28646	-0.143139
V307	0.285405	0.0348184
V630	0.283502	0.0453124
V429	0.282617	0.156333
V638	0.282172	0.00540569
V489	0.280117	0.17926
V217	0.280061	-0.0178179
V448	0.277969	0.159538
V444	0.277875	-0.0490414
V372	0.27711	0.14225
V349	0.277094	0.155667
V556	0.275966	0.0588993
V637	0.272163	0.319033
V530	0.270884	0.0235166
V672	0.270263	-0.316681
V535	0.269815	0.0108376
V462	0.267722	-0.0270257
V710	0.267036	-0.311236
V587	0.264296	0.288343
V593	0.26416	0.0607985
V730	0.260138	0.0368024
V749	0.257757	-0.13037
V479	0.254578	0.0765124
V718	0.254261	0.11398
V431	0.254045	0.0916007
V678	0.247724	-0.0124054
V438	0.247567	0.0746358
V750	0.246883	-0.0696679
V321	0.242189	-0.0691783
V620	0.242002	-0.2512
V256	0.239866	-0.131319
V705	0.239255	0.16155
V306	0.239066	-0.0809549
V133	0.237085	0.0574516
V390	0.230277	0.0390244
V766	0.228659	0.0796889
V564	0.228324	0.230493
V388	0.221673	0.0958946
V597	0.221565	0.0797052
V695	0.22132	0.138515
V255	0.220819	-0.0324951
V704	0.21888	0.157256
V464	0.215095	0.13506
V316	0.212821	-0.0121841
V572	0.209071	0.0845245
V759	0.201205	0.105392
V358	0.194423	-0.071385
V441	0.190318	0.106275
V498	0.187834	0.101814
V709	0.185415	0.0640198
V744	0.183159	0.15896
V524	0.169215	-0.00797884
V742	0.166403	-0.0900627
V327	0.16482	-0.0506045
V611	0.164297	0.0792068
V356	0.163818	-0.121548
V634	0.163689	0.000256877
V557	0.160587	0.0855757
V694	0.155999	-0.181751
V692	0.145795	0.117472
V485	0.14203	-0.0648044
V553	0.137418	0.0391866
V714	0.136479	-0.0216007
V667	0.13324	0.0455594
V617	0.132179	0.0997073
V271	0.129689	0.023439
V753	0.121561	-0.0705358
V605	0.118291	0.0165142
V427	0.107537	0.0115507
V640	0.106151	0.00729304
V726	0.10526	-0.0759617
V391	0.0788152	-0.0251103

## Sheet: negAXvsA
Var ID (Primary)	M4.VIP[1+4+0]	M4.p(corr)[1]
V290	8.70016	0.810961
V621	8.15675	-0.429127
V33	7.23047	0.639623
V246	5.84845	0.760869
V328	4.2562	0.888961
V559	4.13552	-0.419485
V585	3.9091	-0.517976
V13	3.77152	0.175797
V382	3.67771	0.874305
V379	2.83543	0.823288
V1	2.73143	-0.567516
V2	2.63201	-0.575124
V331	2.61435	0.843026
V452	2.37259	0.859509
V374	2.25146	0.632507
V380	2.24251	0.849155
V420	2.19368	0.857676
V447	2.14753	-0.24828
V332	2.12737	0.869782
V450	2.10233	0.71339
V311	2.0936	0.698792
V333	2.09011	0.739675
V133	2.05548	-0.432229
V381	1.99391	0.866217
V292	1.99145	0.798421
V192	1.96705	0.690087
V3	1.96263	-0.488447
V247	1.95825	0.795651
V322	1.90863	0.697338
V303	1.89479	0.627772
V266	1.85272	0.627369
V568	1.85037	0.738436
V89	1.82936	0.222293
V419	1.82696	0.612812
V538	1.8208	0.749396
V477	1.7538	-0.10332
V4	1.69897	-0.0384814
V451	1.64085	0.627654
V5	1.63226	-0.550505
V762	1.62302	0.67819
V271	1.57685	-0.637857
V10	1.54259	-0.579142
V701	1.51232	0.515543
V15	1.50068	-0.339361
V373	1.49674	0.624139
V28	1.46191	0.184179
V9	1.45865	-0.0454002
V355	1.44479	0.613518
V239	1.43781	-0.229852
V475	1.39193	0.545409
V323	1.37789	0.715196
V329	1.36634	0.847119
V397	1.3651	0.540235
V402	1.36193	0.611233
V368	1.35014	-0.224523
V495	1.3404	0.632411
V8	1.3376	0.026515
V30	1.30608	0.11888
V740	1.30414	0.660611
V7	1.30402	-0.466361
V25	1.29257	-0.374698
V312	1.29219	0.674825
V473	1.28257	0.694781
V64	1.28218	-0.351925
V20	1.27617	-0.512238
V391	1.26756	-0.501434
V291	1.25201	0.79241
V188	1.25067	-0.374726
V679	1.24659	0.511842
V517	1.2446	0.541026
V610	1.24387	0.58548
V14	1.24327	-0.24026
V80	1.2408	-0.366256
V551	1.20561	-0.484577
V310	1.20098	0.651417
V128	1.19954	-0.170483
V11	1.19868	-0.462972
V449	1.18342	0.628466
V79	1.18137	-0.368767
V367	1.18056	0.807766
V35	1.18041	-0.598349
V238	1.17998	-0.4384
V146	1.17774	-0.210037
V317	1.17591	-0.296941
V240	1.17463	-0.34852
V478	1.17268	0.813581
V474	1.16578	0.610625
V101	1.1466	-0.279456
V82	1.14517	-0.350729
V537	1.14499	0.180373
V567	1.13508	0.645841
V283	1.11695	-0.31126
V469	1.10511	-0.266073
V293	1.10495	0.728333
V418	1.10413	0.576949
V81	1.10127	-0.300421
V190	1.09515	0.141524
V682	1.09132	0.598186
V63	1.09004	-0.374363
V242	1.08654	-0.320941
V284	1.08398	-0.277685
V422	1.06624	-0.273602
V26	1.05758	-0.465747
V43	1.05622	-0.242017
V193	1.05189	0.111609
V658	1.04704	-0.2369
V258	1.04216	-0.249378
V350	1.04168	0.572002
V456	1.03471	-0.32235
V227	1.02881	-0.367424
V251	1.02511	-0.270973
V369	1.02247	-0.32983
V566	1.02108	0.71597
V248	1.02006	-0.319238
V681	1.01773	0.47917
V565	1.01215	0.474572
V36	1.00901	-0.144704
V72	1.00128	-0.41922
V130	1.00098	-0.16479
V74	0.999501	-0.515287
V221	0.996672	-0.0348868
V42	0.99579	-0.127025
V24	0.995764	-0.453235
V592	0.994198	0.468051
V343	0.992585	0.693992
V302	0.991376	0.681626
V23	0.988586	0.585879
V204	0.97854	-0.310973
V92	0.973603	-0.0942155
V688	1.07189	-0.560041
V514	0.96646	-0.301505
V285	0.96479	-0.401578
V113	0.953159	-0.154016
V22	0.949603	-0.330288
V342	1.03731	0.688478
V361	0.937002	0.704695
V425	0.932993	-0.347808
V29	0.930238	-0.099143
V53	0.927376	-0.239342
V237	0.922556	-0.23999
V426	0.921969	-0.300697
V78	0.918984	-0.256472
V540	0.918917	0.650762
V127	0.915334	-0.296166
V95	0.914303	0.575838
V518	0.908909	0.503584
V58	0.908882	-0.487088
V126	0.903464	-0.169989
V241	0.903121	-0.390938
V198	0.901778	-0.148235
V18	0.901581	-0.311542
V276	0.90129	0.0139327
V73	0.901273	-0.490555
V370	0.90017	-0.266868
V38	0.898394	-0.317838
V6	0.897305	-0.192136
V405	0.894125	-0.365648
V590	0.891884	0.697864
V401	0.888028	0.602138
V586	0.885933	-0.298556
V383	0.884691	0.712016
V282	0.876808	-0.582598
V213	0.873126	-0.399587
V583	0.872353	-0.468637
V27	0.871976	-0.535549
V60	0.869762	-0.362636
V147	0.867422	-0.435931
V77	0.867079	-0.626131
V609	0.865534	0.539458
V560	0.864747	-0.261171
V211	0.86348	0.00293654
V428	0.860676	0.711794
V515	0.860176	-0.358393
V732	0.856088	-0.324026
V209	0.851319	-0.283806
V114	0.838675	-0.130501
V129	0.838008	-0.22655
V163	0.834412	-0.417792
V84	0.829292	-0.518771
V195	0.828477	-0.221101
V457	0.826776	-0.392375
V68	0.825833	-0.496297
V148	0.825293	-0.295517
V164	0.820991	-0.317837
V281	0.820943	-0.422074
V49	0.819882	0.188816
V155	0.819115	-0.363524
V761	0.818189	0.568021
V308	0.818105	-0.446039
V45	0.81617	-0.532148
V62	0.815343	-0.540861
V532	0.810791	-0.542416
V12	0.806567	-0.320145
V467	0.806298	-0.461411
V403	0.803562	0.568969
V453	1.80017	0.505623
V61	0.791928	-0.592041
V205	0.791544	-0.307825
V336	0.788895	0.682459
V76	0.788025	-0.633025
V668	0.778473	-0.406678
V206	0.778145	-0.399623
V325	0.777527	0.244389
V365	0.775841	0.629952
V194	0.769488	0.155766
V471	0.76941	-0.538256
V521	0.769399	-0.421727
V739	0.765829	0.643794
V443	0.764259	-0.863497
V250	0.76396	-0.334717
V180	0.763208	-0.395763
V186	0.762444	-0.4746
V491	0.756178	0.576365
V334	0.753274	0.596522
V83	0.752764	-0.284686
V569	0.75213	0.659781
V608	0.751478	0.475172
V75	0.745965	-0.635513
V183	0.743944	-0.641301
V156	0.743429	-0.300031
V339	0.741885	0.530992
V176	0.741409	-0.45702
V268	0.741399	-0.432586
V179	0.73935	-0.556541
V324	0.739283	-0.770317
V175	0.736418	-0.539036
V509	0.733633	0.663128
V490	0.733582	-0.256731
V623	0.731018	0.393448
V410	0.730871	-0.443855
V371	0.729942	-0.326321
V696	0.729815	-0.291207
V51	0.727233	-0.468841
V606	0.727189	0.0169904
V408	0.724729	0.550475
V650	0.724375	-0.46854
V498	0.724166	-0.599547
V476	0.724102	0.427868
V48	0.722248	-0.569235
V409	0.722108	-0.743098
V642	0.721544	-0.658015
V67	0.721388	-0.475564
V257	0.719974	-0.407066
V184	0.718976	-0.62028
V16	0.717308	-0.444852
V132	0.714308	-0.309143
V330	0.714299	0.511105
V157	0.713884	-0.407004
V196	0.712741	0.0352277
V494	0.711677	-0.449602
V216	0.710142	-0.138087
V398	0.70873	0.453181
V591	0.708328	0.464732
V468	0.705134	-0.797453
V85	0.704101	-0.502765
V124	0.703069	-0.521955
V716	0.7025	0.188177
V384	0.700948	0.692748
V70	0.700133	-0.642777
V326	0.699453	-0.453387
V576	0.698209	-0.614683
V746	0.697513	-0.491347
V112	0.696154	-0.214403
V199	0.696022	-0.278676
V131	0.694016	-0.525389
V123	0.693592	-0.233295
V71	0.693301	-0.486805
V39	0.689915	-0.108529
V506	0.689143	-0.78869
V21	0.689054	-0.552306
V393	0.688326	-0.74212
V173	0.687731	-0.794886
V533	0.687463	-0.489946
V633	0.686366	-0.456728
V710	0.68594	-0.70256
V341	0.683508	-0.611743
V151	0.68098	-0.398514
V185	0.680231	-0.599896
V751	0.679334	-0.736563
V575	0.679271	0.318423
V187	0.670055	-0.631446
V182	0.668214	-0.590164
V542	0.667514	0.202945
V507	0.667084	-0.651534
V320	0.666087	0.594782
V673	0.664584	-0.549922
V703	0.664147	0.576917
V177	0.661334	-0.50399
V256	0.658965	-0.631955
V346	0.658653	-0.794313
V685	0.657958	-0.00915878
V445	0.656889	-0.883431
V37	0.656258	-0.354779
V511	0.653365	-0.865539
V57	0.653099	-0.525492
V297	0.652958	0.512269
V217	0.652565	-0.686027
V118	0.652118	-0.413769
V439	0.651218	-0.724104
V554	0.650892	-0.483636
V503	0.648706	-0.387405
V139	0.648333	-0.41033
V665	0.645358	-0.612849
V230	0.645147	-0.715583
V166	0.644524	-0.399181
V117	0.64394	-0.295045
V465	0.643898	-0.457073
V65	0.642964	-0.619551
V162	0.64169	-0.457823
V711	0.641115	-0.67202
V165	0.639895	-0.529689
V584	0.639828	-0.635756
V619	0.638481	-0.837539
V229	0.636968	-0.465611
V748	0.635514	-0.426438
V50	0.633303	-0.352675
V638	0.632999	-0.838721
V160	0.63249	-0.738101
V765	0.631936	-0.840098
V435	0.628743	-0.584701
V181	0.628383	-0.612
V201	0.628286	-0.288664
V615	0.627553	-0.561435
V270	0.626699	-0.265499
V86	0.626185	-0.0545926
V345	0.6254	0.62591
V152	0.62453	-0.274272
V612	0.62336	-0.685442
V557	0.622177	-0.794914
V417	0.622112	0.480551
V215	0.620367	-0.437191
V335	0.619099	-0.342035
V646	0.619074	0.434214
V686	0.618708	-0.618759
V93	0.618025	-0.215448
V587	0.617843	-0.669811
V34	0.617635	-0.319872
V440	0.616954	-0.840668
V200	0.615814	0.0489909
V236	0.615027	-0.398794
V178	0.612979	-0.608219
V407	0.612708	-0.829315
V356	0.612638	-0.669627
V90	0.611739	0.0738256
V433	0.610529	-0.491218
V472	0.610484	-0.369258
V288	0.610404	0.245157
V444	0.609832	-0.608932
V150	0.609575	-0.401304
V755	0.607665	-0.688022
V232	0.607324	-0.565297
V508	0.606778	-0.828605
V96	0.60659	-0.0939389
V262	0.604316	0.248462
V713	0.603519	-0.746147
V97	0.603066	-0.115248
V549	0.598856	-0.0459491
V174	0.597828	-0.717971
V448	0.595649	-0.621907
V640	0.594647	-0.641957
V122	0.594249	-0.19238
V649	0.59424	-0.458843
V41	0.593196	-0.356966
V154	0.592453	-0.557568
V758	0.590987	-0.567817
V769	0.590741	-0.73869
V768	0.588836	-0.778894
V641	0.588738	-0.744563
V348	0.588269	-0.573674
V539	0.587895	0.438006
V255	0.584861	-0.506323
V745	0.581794	-0.704066
V358	0.577908	-0.768281
V618	0.577656	-0.770291
V644	0.577399	0.498078
V158	0.576507	-0.491468
V167	0.575744	-0.640178
V694	0.575247	-0.758081
V404	0.573237	-0.698942
V581	0.572401	-0.53351
V103	0.571406	-0.81151
V386	0.570429	0.504515
V161	0.569223	-0.67501
V169	0.569117	-0.593168
V742	0.568723	-0.701527
V691	0.568501	-0.734758
V756	0.567748	-0.73117
V340	0.5657	0.524884
V170	0.565655	-0.51681
V648	0.565528	-0.743505
V678	0.565381	-0.677066
V366	0.565026	-0.615958
V168	0.563958	-0.739366
V375	0.563659	0.425233
V620	0.562324	-0.720878
V106	0.56203	0.141561
V31	0.561632	0.0133813
V294	0.561418	-0.748418
V265	0.56064	-0.777375
V17	0.560204	-0.332709
V564	0.560172	-0.671746
V40	0.560041	-0.266475
V278	0.558347	0.496836
V502	0.55724	-0.25097
V321	0.55721	-0.737153
V119	0.55649	-0.697538
V316	0.556158	-0.366466
V143	0.556014	-0.281868
V726	0.555216	-0.727112
V531	0.553902	-0.759732
V253	0.551641	0.501205
V442	0.551636	-0.710835
V234	0.551069	-0.320759
V318	0.550478	-0.552187
V636	0.548845	-0.711205
V279	0.546599	0.0995442
V274	0.546348	-0.643474
V692	0.546167	-0.713035
V277	0.545993	-0.178542
V377	0.545322	-0.495367
V656	0.545293	-0.730622
V671	0.543219	-0.741342
V88	0.541253	-0.291746
V729	0.540738	-0.741277
V19	0.54051	-0.281469
V744	0.537742	-0.691935
V708	0.536683	-0.506322
V243	0.535593	-0.404898
V315	0.535316	0.338047
V149	0.535288	-0.421246
V59	0.534342	0.656602
V415	0.53399	-0.491733
V674	0.533953	-0.638659
V598	0.533679	-0.749241
V52	0.532974	-0.433446
V602	0.530466	-0.715818
V772	0.529597	-0.617453
V749	0.529141	-0.6293
V159	0.528971	-0.6451
V197	0.528947	-0.671873
V286	0.525671	-0.367326
V693	0.525371	-0.690815
V388	0.525087	-0.611906
V153	0.52466	-0.48216
V631	0.524339	-0.715012
V723	0.523834	-0.442664
V134	0.523787	-0.291853
V66	0.522797	-0.697165
V676	0.521835	-0.609185
V245	0.520483	-0.606974
V145	0.520469	-0.352807
V724	0.519627	-0.51899
V753	0.519189	-0.679843
V189	0.51755	-0.31307
V203	0.51616	-0.0975479
V757	0.514387	-0.588039
V301	0.513563	-0.779378
V662	0.512553	-0.667082
V643	0.511335	0.286086
V249	0.510911	-0.364121
V488	0.509243	-0.581808
V212	0.508877	-0.141905
V645	0.508702	0.407751
V639	0.508152	-0.635913
V672	0.507509	-0.632412
V424	0.50726	-0.484939
V171	0.507228	-0.711447
V280	0.506571	0.122334
V389	0.506356	-0.438301
V578	0.505207	-0.348661
V446	0.505004	0.147311
V254	0.502881	-0.630624
V482	0.501552	-0.699702
V625	0.50001	0.412843
V376	0.499005	-0.560804
V349	0.498944	-0.627223
V269	0.498698	-0.484733
V298	0.497978	-0.129122
V138	0.497592	-0.43704
V600	0.494612	-0.572398
V627	0.494269	-0.643839
V99	0.493823	-0.0682746
V635	0.49345	-0.620979
V56	0.49309	0.115943
V275	0.492982	0.471343
V558	0.49252	-0.661647
V759	0.492426	-0.604125
V634	0.492393	-0.633634
V677	0.492226	-0.611744
V489	0.49143	-0.665035
V675	0.491285	-0.576824
V32	0.490753	-0.267317
V46	0.489514	-0.331026
V142	0.488942	-0.374136
V121	0.488812	-0.158445
V115	0.488747	-0.112267
V434	0.488695	-0.0256204
V715	0.488534	0.364756
V695	0.487634	-0.605429
V774	0.487571	-0.532632
V441	0.487517	-0.642531
V210	0.486789	-0.300787
V709	0.486451	-0.583816
V485	0.486186	-0.623443
V94	0.485904	0.130106
V327	0.485373	-0.555488
V359	0.484317	-0.614794
V219	0.484164	-0.0625487
V553	0.483748	-0.635471
V630	0.483508	-0.4419
V764	0.483411	-0.618775
V704	0.483157	-0.658709
V690	0.483031	-0.648485
V714	0.481977	-0.602626
V605	0.481669	-0.664218
V651	0.480247	-0.599446
V555	0.478752	-0.596396
V111	0.47765	0.294841
V141	0.477021	-0.22591
V360	0.476537	-0.666668
V261	0.47589	-0.66543
V337	0.473874	0.121237
V137	0.473724	-0.0198312
V647	0.473242	-0.388015
V684	0.472794	-0.60714
V304	0.47266	-0.581007
V628	0.472611	-0.585164
V394	0.471484	-0.554285
V107	0.467752	-0.000325923
V747	0.467419	-0.590778
V689	0.466867	0.0306237
V655	0.463725	-0.570822
V670	0.463152	-0.575298
V589	0.462035	0.308045
V526	0.461935	-0.470743
V773	0.461528	-0.61884
V140	0.461323	-0.375161
V730	0.460935	-0.573449
V224	0.460356	0.333656
V733	0.459852	-0.578785
V105	0.45945	-0.232429
V766	0.459079	-0.431326
V516	0.459072	-0.578461
V487	0.459031	-0.57294
V223	0.457361	-0.362718
V272	0.453804	-0.330962
V120	0.453576	-0.317623
V372	0.453133	-0.331636
V411	0.452346	-0.366228
V102	0.452138	-0.412931
V300	0.451712	-0.318172
V546	0.450813	-0.556056
V357	0.450474	-0.606735
V191	0.450087	-0.652159
V601	0.449939	-0.544194
V299	0.449186	-0.514239
V313	0.448968	-0.381249
V603	0.448825	-0.554134
V582	0.446986	-0.542959
V486	0.446526	-0.438794
V364	0.446159	0.472015
V637	0.4419	-0.542458
V687	0.441194	-0.537081
V228	0.440826	0.312585
V604	0.440519	-0.519425
V667	0.440025	-0.561582
V295	0.439781	-0.269601
V412	0.438726	-0.518844
V659	0.438378	0.351871
V235	0.438268	-0.454541
V573	0.438198	-0.598162
V479	0.437138	-0.52785
V722	0.43579	-0.109957
V513	0.434614	0.39659
V535	0.432427	-0.252636
V529	0.431769	-0.523466
V390	0.431568	-0.361289
V319	0.431413	-0.507657
V624	0.43063	-0.507059
V617	0.429328	-0.510599
V501	0.429111	-0.538497
V172	0.428915	-0.453857
V100	0.428854	0.10372
V771	0.428841	-0.46862
V614	0.428285	-0.213146
V414	0.426433	-0.278907
V307	0.425723	-0.536371
V706	0.425417	-0.496777
V512	0.422637	-0.179599
V519	0.422304	-0.573657
V385	0.422096	0.163509
V543	0.421947	-0.345833
V652	0.42084	-0.523652
V108	0.420495	-0.470494
V556	0.420355	-0.49558
V406	0.420308	0.390778
V743	0.419176	-0.498243
V110	0.418942	0.086373
V400	0.416976	0.433998
V536	0.416625	0.258153
V719	0.416465	-0.50835
V520	0.41618	-0.551493
V431	0.415136	-0.532589
V541	0.414836	-0.486072
V622	0.413784	-0.23051
V754	0.413297	-0.472153
V493	0.409767	-0.329382
V395	0.409577	0.38339
V653	0.409056	-0.51972
V296	0.408736	-0.477619
V87	1.40491	-0.561266
V207	0.404013	0.16169
V351	0.398764	-0.229353
V231	0.398664	-0.28274
V214	0.398599	0.012958
V661	0.398468	0.213739
V725	0.398182	-0.474586
V427	0.397108	-0.490596
V260	0.397054	0.240055
V720	0.397019	-0.472685
V109	0.396874	-0.229043
V580	0.394455	-0.511823
V736	0.394125	0.133545
V225	0.394026	-0.497637
V306	0.39236	-0.419757
V728	0.392197	-0.446587
V226	0.390561	-0.190024
V104	0.389407	-0.352214
V44	0.387928	-0.215165
V470	0.385218	-0.128735
V705	0.383683	-0.480524
V55	0.382178	0.0681492
V264	0.378939	-0.394218
V550	0.37259	-0.479807
V347	0.371936	0.35378
V455	0.371316	0.3585
V707	0.371248	-0.452164
V718	0.368185	-0.411003
V579	0.367614	-0.462645
V611	0.367469	-0.411801
V273	0.367191	-0.0127849
V202	0.366603	-0.0745994
V263	0.364023	-0.464434
V534	0.360646	-0.116923
V698	0.360476	0.22163
V699	0.360297	-0.383198
V737	0.359792	-0.332446
V741	0.355065	-0.466376
V432	2.35429	-0.616633
V597	0.353786	-0.410806
V314	0.350478	-0.353775
V125	0.350438	-0.24664
V752	0.350154	-0.372429
V222	0.349963	-0.428941
V399	0.347518	-0.345734
V594	0.347001	-0.438651
V731	0.345146	-0.370339
V632	0.344819	-0.351182
V98	0.341979	-0.0649067
V480	0.341963	0.289812
V510	0.341012	0.28635
V259	0.340803	0.17533
V593	0.340796	-0.408528
V528	0.340586	-0.377721
V523	0.340343	-0.387735
V548	0.339183	-0.0327821
V289	0.338612	-0.396076
V208	0.338492	-0.0929574
V595	0.337779	-0.275217
V697	0.336352	-0.300535
V563	0.334042	-0.288712
V577	0.332936	0.124526
V571	0.331436	-0.368072
V770	0.331433	-0.262261
V54	0.331402	-0.269823
V135	0.330691	-0.195144
V663	0.330437	-0.155694
V309	0.329675	0.0735835
V464	0.327799	-0.342032
V727	0.327593	-0.312054
V461	0.327072	-0.360198
V545	0.327044	-0.330417
V572	0.326273	-0.346291
V505	0.325722	-0.237586
V460	0.323754	-0.045081
V458	0.321617	-0.335861
V499	0.321485	-0.321581
V760	0.320578	0.213911
V616	0.319348	-0.310087
V626	0.317679	-0.299054
V496	0.316624	-0.293912
V596	0.31405	-0.352428
V607	0.312479	0.1541
V481	0.311329	-0.335338
V413	0.310322	-0.26338
V561	0.306856	-0.291423
V524	0.30645	-0.291262
V712	0.306424	-0.255356
V654	0.306189	-0.276757
V244	0.305805	-0.270752
V669	0.304389	0.133141
V734	0.303649	0.0215911
V352	0.303396	-0.120389
V735	0.302611	0.208669
V438	0.300836	-0.205123
V562	0.299465	-0.164892
V353	0.299314	0.22937
V354	0.296147	0.162159
V530	0.295591	-0.241498
V430	0.293926	-0.311403
V527	0.292285	-0.240449
V750	0.29153	-0.256271
V570	0.283691	-0.25225
V666	0.281879	-0.20269
V492	0.281624	-0.057146
V574	0.28101	0.187443
V220	0.280669	-0.180608
V218	0.279838	-0.264345
V116	0.278868	-0.2131
V459	0.278086	-0.229248
V497	0.275078	-0.165477
V613	0.272453	-0.0659773
V466	0.272258	0.0954294
V338	0.27164	-0.167728
V500	0.269308	0.101172
V387	0.264221	0.176134
V252	0.262614	-0.165433
V483	0.260995	-0.0594844
V233	0.259601	-0.235098
V421	0.258189	0.204873
V629	0.257134	-0.159148
V588	0.255419	0.162208
V547	0.255326	-0.196174
V721	0.255274	-0.24731
V657	0.252782	-0.127433
V416	0.252705	-0.233617
V767	0.252605	-0.223785
V423	0.252269	0.016638
V429	0.252065	-0.217584
V47	0.250106	-0.0731126
V552	0.248805	-0.184508
V463	0.245709	-0.065576
V700	0.245359	-0.111534
V522	0.24471	-0.174528
V599	0.244562	0.0865829
V378	0.244337	-0.208923
V462	0.244235	0.103247
V363	0.244196	-0.228971
V525	0.243561	-0.167547
V437	0.242229	-0.0117188
V454	0.241597	0.062422
V396	0.241423	-0.0253561
V738	0.239904	0.0882423
V287	0.239298	-0.0391211
V683	0.239155	-0.199533
V362	0.237373	-0.122961
V664	0.235884	-0.0937883
V344	0.233804	-0.106519
V680	0.233432	0.0510971
V136	0.232073	0.0228502
V484	0.229544	0.0650585
V305	0.226656	-0.0686645
V436	0.224845	-0.183501
V91	0.221992	-0.292279
V702	0.214637	0.0191222
V267	0.213876	0.0894957
V392	0.213626	-0.259238
V544	0.203116	-0.0868546
V717	0.202743	0.0304809
V504	0.20053	-0.0359343
V763	1.18905	-0.625347
V660	0.179153	0.105692
V69	0.147013	-0.0315055
V144	0.133447	-0.0028623
